# Supplementary material for: A machine learning approach for the prediction of aqueous solubility of pharmaceuticals: a comparative model and dataset analysis
Source: Royal Society of Chemistry journal article supplement (doi:10.1039/d4dd00065j), 2024-01-01
Supplement: d4dd00065j1.xlsx [file d4dd00065j1.xlsx]

## Sheet: Dataset_molecules_logS
A Machine Learning Approach for the Prediction of Aqueous Solubility of Pharmaceuticals:
A Comparative Model and Dataset Analysis
Mohammad Amin Ghanavati1, Soroush Ahmadi1,2, Sohrab Rohani1,*
1 Chemical and Biochemical Engineering, Western University, London, Ontario N6A 5B9, Canada
2 Department of Chemical Engineering, Massachusetts Institute of Technology, Cambridge, MA 02139, USA.
Table S1. Experimental logarithm of solubility and SMILES of 3942 molecules
SMILES	LogS	assigned weight based on quality
BrC(Br)(Br)Br	-3.14	1
BrC(Br)Br	-1.808	1
BrC(Br)C(Br)Br	-2.732	1
BrC1CCCCC1	-2.294	1
BrCBr	-1.165	1
BrCCBr	-1.656	1
BrCCCBr	-2.075	1
Brc1cc(Br)c(Br)cc1Br	-6.993	1
Brc1ccc(-c2ccccc2)cc1	-5.553	1
Brc1ccc(Br)c(Br)c1	-4.498	1
Brc1ccc(Br)cc1	-4.072	1
Brc1cccc(Br)c1	-3.543	1
Brc1cccc2ccccc12	-4.347	1
Brc1ccccc1	-2.547	1
Brc1ccccc1Br	-3.5	1
Brc1ccccn1	-0.881	1
C#CC(C)(C)NC(=O)c1cc(Cl)cc(Cl)c1	-4.232	1
C#CC(C)(C)O	1.075	1
C#CC(C)(O)CC	0.115	1
C#CC(C)N(C)C(=O)Nc1ccc(Cl)cc1	-3.897	1
C#CC(C)OC(=O)Nc1cccc(Cl)c1	-2.617	1
C#CC1(O)CCC2C3CCC4=CC(=O)CCC4(C)C3CCC21C	-5.658	1
C#CC1(O)CCC2C3CCC4=CC(=O)CCC4C3CCC21C	-4.627	1
C#CC1(O)CCC2C3CCc4cc(O)ccc4C3CCC21C	-4.419	1
C#CC1(OC(C)=O)CCC2C3CCC4=CC(=O)CCC4C3CCC21C	-4.784	1
C#CC1(OC(N)=O)CCCCC1	-1.825	1
C#CC=C	-1.464	1
C#CCC	-1.275	1
C#CCCC	-1.637	1
C#CCCCC	-2.277	1
C#CCCCC#C	-1.747	1
C#CCCCCC	-3.01	1
C#CCCCCCC	-3.662	1
C#CCCCCCC#C	-2.983	1
C#CCCCCCCC	-4.094	1
C#CCO	1.251	1
C#CCOS(=O)OC1CCCCC1Oc1ccc(C(C)(C)C)cc1	-5.846	1
C#Cc1ccccc1	-2.35	1
C(=Cc1ccccc1)c1ccccc1	-5.793	1
C1=CC=CCC=C1	-2.172	1
C1=CCC=CC1	-2.059	1
C1=CCCC1	-2.105	1
C1=CCCCC1	-2.586	1
C1=CCCCCC1	-3.163	1
C1=Cc2cccc3cccc1c23	-3.976	1
C1CCC2CCCCC2C1	-5.192	1
C1CCCC1	-2.653	1
C1CCCCC1	-3.185	1
C1CCCCCC1	-3.515	1
C1CCCCCCC1	-4.152	1
C1CCN2CC3CC(CN4CCCCC34)C2C1	-1.887	1
C1CCNC1	1.148	1
C1CCNCC1	1.07	1
C1CCOC1	1.142	1
C1CCOCC1	-0.031	1
C1CN2CCN1CC2	0.603	1
C1CNCCN1	1.065	1
C1CO1	1.356	1
C1COCCN1	1.06	1
C1COCCO1	1.055	1
C1COCO1	1.13	1
C1OC1C1CO1	1.065	1
C1OCOCO1	0.288	1
C=C(C(=O)O)c1ccccc1	-2.057	1
C=C(C)C	-2.329	1
C=C(C)C#N	-0.422	1
C=C(C)C(=C)C	-2.4	1
C=C(C)C(=O)O	0.014	1
C=C(C)C(=O)OC	-0.824	1
C=C(C)C(=O)OC(C)(C)C	-2.153	1
C=C(C)C(=O)OCC	-1.325	1
C=C(C)C(=O)OCC(C)C	-2.039	1
C=C(C)C(=O)OCCCC	-2.25	1
C=C(C)C(=O)OCCO	-0.114	1
C=C(C)C(=O)OCCOCCOCCOC(=O)C(=C)C	-1.901	1
C=C(C)C1CC=C(C)C(=O)C1	-2.063	1
C=C(C)C1CC=C(C)CC1	-4.094	1
C=C(C)C=O	-0.039	1
C=C(C)CC	-2.732	1
C=C(C)CCC	-3.033	1
C=C(C)CN(CC)c1c([N+](=O)[O-])cc(C(F)(F)F)cc1[N+](=O)[O-]	-6.222	1
C=C(C)c1ccccc1	-3.008	1
C=C(CC(=O)O)C(=O)O	-0.229	1
C=C(CC(Cl)(Cl)Cl)c1ccccc1	-4.282	1
C=C(Cl)CCl	-1.713	1
C=C(Cl)CSC(=S)N(CC)CC	-3.35	1
C=C(Cl)Cl	-1.634	1
C=C(F)F	-0.706	1
C=C(c1ccccc1)c1ccccc1	-4.436	1
C=C1C=CC(=O)O1	-0.983	1
C=C1CC23CC1(O)CCC2C12C=CC(O)C(C)(C(=O)O1)C2C3C(=O)O	-1.841	1
C=C1CCOC1=O	0.184	1
C=CBr	-1.275	1
C=CC#N	0.147	1
C=CC(=C)C	-2.034	1
C=CC(=O)OC	-0.241	1
C=CC(=O)OCC	-0.824	1
C=CC(=O)OCC(C)C	-1.853	1
C=CC(=O)OCC(C)O	0.886	1
C=CC(=O)OCCCC	-1.807	1
C=CC(=O)OCCO	0.935	1
C=CC(=O)Oc1c(Br)cc(Cl)c2cccnc12	-4.717	1
C=CC(C)(O)CCC=C(C)C	-1.987	1
C=CC(C)C	-2.732	1
C=CC(N)=O	0.954	1
C=CC(O)CC	0.02	1
C=CC(O)CCC	-0.599	1
C=CC1CC=CCC1	-3.335	1
C=CC=C	-1.867	1
C=CC=O	0.578	1
C=CCBr	-1.5	1
C=CCC	-2.405	1
C=CCC(C)C	-3.244	1
C=CCC1(C(C)C)C(=O)NC(=O)NC1=O	-1.712	1
C=CCC1(C(C)CCC)C(=O)NC(=S)NC1=O	-3.458	1
C=CCC1(CC=C)C(=O)NC(=O)NC1=O	-2.061	1
C=CCC1(c2ccccc2)C(=O)NC(=O)NC1=O	-2.152	1
C=CCC=C	-2.087	1
C=CCCBr	-2.247	1
C=CCCC	-2.676	1
C=CCCC=C	-2.687	1
C=CCCCC	-3.226	1
C=CCCCC=C	-3.34	1
C=CCCCCC	-3.732	1
C=CCCCCCC	-4.437	1
C=CCCCCCCC	-5.052	1
C=CCCCCCCCCC(=O)O	-3.398	1
C=CCCCO	-0.179	1
C=CCCl	-1.884	1
C=CCN	1.243	1
C=CCN(CC=C)C(=O)C(Cl)Cl	-1.619	1
C=CCN(CC=C)C(=O)CCl	-0.945	1
C=CCN=C=S	-1.695	1
C=CCNC(N)=S	-0.294	1
C=CCNCC=C	-0.053	1
C=CCO	1.236	1
C=CCOC(=O)c1ccccc1C(=O)OCC=C	-3.131	1
C=CCOCC1CO1	0.092	1
C=CCOCC=C	-0.02	1
C=CCc1ccc(O)c(OC)c1	-1.562	1
C=CCc1ccc(OC)cc1	-2.92	1
C=CCl	-1.36	1
C=CF	-0.276	1
C=COC(C)=O	-0.634	1
C=COC=C	-1.261	1
C=COCC	-0.858	1
C=COCC(F)(F)F	-1.478	1
C=COCCCC	-1.524	1
C=Cc1ccc(C)cc1	-3.123	1
C=Cc1cccc(C)c1	-3.123	1
C=Cc1ccccc1	-2.526	1
CC#CCCCC	-2.771	1
CC#N	1.387	1
CC(=O)C(C)(C)C	-0.722	1
CC(=O)C(C)=O	0.366	1
CC(=O)C(C)C	-0.151	1
CC(=O)C1(O)CCC2C3CC(C)C4=CC(=O)C=CC4(C)C3(F)C(O)CC21C	-4.099	1
CC(=O)C1(O)CCC2C3CCC4=CC(=O)CCC4(C)C3CCC21C	-4.708	1
CC(=O)C1C(=O)C=C(C)OC1=O	-1.226	1
CC(=O)C1CCC2C3CC=C4CC(O)CCC4(C)C3CCC12C	-4.652	1
CC(=O)C1CCC2C3CCC4=CC(=O)CCC4(C)C3CCC12C	-4.553	1
CC(=O)C1CCOC1=O	0.193	1
CC(=O)C=C(C)C	-0.531	1
CC(=O)CC(C)=O	0.22	1
CC(=O)CC(C)C	-0.722	1
CC(=O)CC(c1ccccc1)c1c(O)c2ccccc2oc1=O	-4.259	1
CC(=O)CCC(C)C	-1.325	1
CC(=O)N(C)C	1.06	1
CC(=O)N(C)c1ccccc1	-0.951	1
CC(=O)NCC(=O)O	-0.649	1
CC(=O)NS(=O)(=O)c1ccc(N)cc1	-1.234	1
CC(=O)Nc1cc(NS(=O)(=O)C(F)(F)F)c(C)cc1C	-3.237	1
CC(=O)Nc1ccc(N=Nc2cc(C)ccc2O)cc1	-5.358	1
CC(=O)Nc1ccc(O)cc1	-1.033	1
CC(=O)Nc1ccc(OC(=O)c2ccccc2OC(C)=O)cc1	-4.195	1
CC(=O)Nc1ccc(OC(C)=O)cc1	-1.908	1
CC(=O)Nc1ccc(S(N)(=O)=O)cc1	-1.607	1
CC(=O)Nc1ccc2c(c1)Cc1ccccc1-2	-4.625	1
CC(=O)Nc1cccc(C)c1	-2.091	1
CC(=O)Nc1ccccc1	-1.29	1
CC(=O)Nc1ccccc1Cl	-1.4	1
CC(=O)Nc1ccccc1O	-2.235	1
CC(=O)Nc1ccccc1[N+](=O)[O-]	-1.909	1
CC(=O)Nc1nnc(S(N)(=O)=O)s1	-2.356	1
CC(=O)O	1.221	1
CC(=O)OC(C)(C)C	-1.144	1
CC(=O)OC(C)=O	0.07	1
CC(=O)OC(C)C	-0.519	1
CC(=O)OC(C)CC(C)C	-2.045	1
CC(=O)OC1(C(C)=O)CCC2C3C=C(C)C4=CC(=O)CCC4(C)C3CCC21C	-5.284	1
CC(=O)OC1(C(C)=O)CCC2C3C=C(Cl)C4=CC(=O)C=CC4(C)C3CCC21C	-4.945	1
CC(=O)OCC(=O)C1(O)CCC2C3CCC4=CC(=O)C=CC4(C)C3C(O)CC21C	-4.369	1
CC(=O)OCC(=O)C1(O)CCC2C3CCC4=CC(=O)CCC4(C)C3C(=O)CC21C	-4.304	1
CC(=O)OCC(=O)C1(O)CCC2C3CCC4=CC(=O)CCC4(C)C3C(O)CC21C	-4.458	1
CC(=O)OCC(=O)C1CCC2C3CCC4=CC(=O)CCC4(C)C3CCC12C	-4.63	1
CC(=O)OCC(C)C	-1.266	1
CC(=O)OCC(COC(C)=O)OC(C)=O	-0.575	1
CC(=O)OCCBr	-0.674	1
CC(=O)OCCC(C)C	-1.814	1
CC(=O)OCCOC(C)=O	0.086	1
CC(=O)OCc1ccccc1	-1.685	1
CC(=O)Oc1c(C(C)(C)C)cc([N+](=O)[O-])c(C)c1[N+](=O)[O-]	-4.472	1
CC(=O)Oc1ccc(Br)cc1C(=O)O	-2.589	1
CC(=O)Oc1ccc2c3c1OC1C(OC(C)=O)C=CC4C(C2)N(C)CCC341	-2.797	1
CC(=O)Oc1ccccc1C(=O)O	-1.593	1
CC(=O)Oc1ccccc1C(=O)OCS(C)(=O)=O	-3.394	1
CC(=O)SC1CC2=CC(=O)CCC2(C)C2CCC3(C)C(CCC34CCC(=O)O4)C12	-4.277	1
CC(=O)c1c(O)c(C)c(O)c2c1OC1=CC(=O)C(C(C)=O)C(=O)C12C	-3.537	1
CC(=O)c1ccc(N)cc1	-1.606	1
CC(=O)c1ccc(O)c(O)c1O	-2.022	1
CC(=O)c1ccc(O)cc1	-1.138	1
CC(=O)c1ccccc1	-1.292	1
CC(Br)CBr	-2.141	1
CC(C(=O)O)C(=O)O	0.76	1
CC(C(=O)O)c1ccc(-c2ccccc2)c(F)c1	-4.485	1
CC(C(=O)O)c1cccc(C(=O)c2ccccc2)c1	-3.698	1
CC(C)(C(=O)O)C(=O)O	-0.167	1
CC(C)(C)Br	-2.359	1
CC(C)(C)C	-3.337	1
CC(C)(C)C(=O)C(Oc1ccc(Cl)cc1)n1cncn1	-3.614	1
CC(C)(C)C(=O)C1C(=O)c2ccccc2C1=O	-4.107	1
CC(C)(C)C(=O)O	-0.673	1
CC(C)(C)C(=O)OCC(=O)C1(O)CCC2C3CCC4=CC(=O)C=CC4(C)C3C(O)CC21C	-4.583	1
CC(C)(C)C(C)(C)O	-0.723	1
CC(C)(C)C(O)C(Cc1ccc(Cl)cc1)n1cncn1	-3.924	1
CC(C)(C)C(O)C(Cc1ccc(Cl)cc1Cl)n1cncn1	-4.562	1
CC(C)(C)C(O)C(Oc1ccc(-c2ccccc2)cc1)n1cncn1	-4.829	1
CC(C)(C)C(O)C(Oc1ccc(Cl)cc1)n1cncn1	-3.392	1
CC(C)(C)CCCO	-1.551	1
CC(C)(C)CCO	-0.5	1
CC(C)(C)CO	-0.401	1
CC(C)(C)Cl	-1.507	1
CC(C)(C)N	1.136	1
CC(C)(C)NCC(O)c1ccc(O)c(CO)c1	-1.224	1
CC(C)(C)O	1.13	1
CC(C)(C)OOC(C)(C)C	-3.165	1
CC(C)(C)c1ccc(C(=O)O)cc1	-3.804	1
CC(C)(C)c1ccc(O)c(O)c1	-1.92	1
CC(C)(C)c1ccc(O)cc1	-2.413	1
CC(C)(C)c1ccccc1	-3.658	1
CC(C)(C)c1nnc(NS(=O)(=O)c2ccc(N)cc2)s1	-3.74	1
CC(C)(O)C(Cl)(Cl)Cl	-1.346	1
CC(C)(O)CCS(=O)(=O)c1ccc(S(N)(=O)=O)cc1	-1.944	1
CC(C)(O)CCSc1ccc(S(N)(=O)=O)cc1	-2.838	1
CC(C)(S)C(N)C(=O)O	-0.128	1
CC(C)(c1ccc(O)cc1)c1ccc(O)cc1	-3.279	1
CC(C)=CC1C(C(=O)OCN2C(=O)C3=C(CCCC3)C2=O)C1(C)C	-4.858	1
CC(C)=CCCC(C)=CC=O	-2.055	1
CC(C)=O	1.236	1
CC(C)Br	-1.631	1
CC(C)C	-3.076	1
CC(C)C(=O)C(C)C	-1.302	1
CC(C)C(=O)O	0.278	1
CC(C)C(C(=O)OC(C#N)c1cccc(Oc2ccccc2)c1)c1ccc(Cl)cc1	-7.243	1
CC(C)C(C)(C)O	-0.411	1
CC(C)C(C)C	-3.583	1
CC(C)C(C)C(C)C	-4.696	1
CC(C)C(C)O	-0.197	1
CC(C)C(Nc1ccc(C(F)(F)F)cc1Cl)C(=O)OC(C#N)c1cccc(Oc2ccccc2)c1	-8.4	1
CC(C)C(O)C(C)C	-1.22	1
CC(C)C=O	0.091	1
CC(C)CBr	-2.432	1
CC(C)CC(=O)CC(C)C	-1.731	1
CC(C)CC(=O)O	-0.4	1
CC(C)CC(C)(C)C	-4.746	1
CC(C)CC(C)(C)O	-0.961	1
CC(C)CC(C)C	-4.261	1
CC(C)CC(C)O	-0.795	1
CC(C)CC(N)C(=O)O	-0.785	1
CC(C)CC(O)CC(C)C	-2.159	1
CC(C)CCBr	-2.887	1
CC(C)CCC(C)(C)C	-5.047	1
CC(C)CCC(C)O	-1.38	1
CC(C)CCCCCCO	-2.487	1
CC(C)CCCO	-1.14	1
CC(C)CCO	-0.519	1
CC(C)CCOC(=O)c1ccccc1O	-3.157	1
CC(C)CCOC=O	-1.547	1
CC(C)CCOCCC(C)C	-2.898	1
CC(C)CN	1.136	1
CC(C)CO	0.059	1
CC(C)COC(=O)C(C)C	-2.403	1
CC(C)COC(=O)c1ccc(N)cc1	-2.944	1
CC(C)COC(=O)c1ccccc1C(=O)OCC(C)C	-4.652	1
CC(C)COC=O	-1.001	1
CC(C)Cl	-1.404	1
CC(C)N	1.228	1
CC(C)N(C(=O)CCl)c1ccccc1	-2.481	1
CC(C)N(N=O)C(C)C	-1.001	1
CC(C)N1C(=O)c2ccccc2NS1(=O)=O	-2.682	1
CC(C)NC(C)C	0.036	1
CC(C)Nc1nc(Cl)nc(NC(C)C)n1	-4.427	1
CC(C)Nc1nc(N)nc(Cl)n1	-2.706	1
CC(C)O	1.221	1
CC(C)OC(=O)C(C(=O)OC(C)C)=C1SCCS1	-3.782	1
CC(C)OC(=O)C(C)N(C(=O)c1ccccc1)c1ccc(F)c(Cl)c1	-4.4335	1
CC(C)OC(=O)C(O)(c1ccc(Br)cc1)c1ccc(Br)cc1	-4.933	1
CC(C)OC(=O)C(O)(c1ccc(Cl)cc1)c1ccc(Cl)cc1	-4.53	1
CC(C)OC(=O)Nc1cccc(Cl)c1	-3.38	1
CC(C)OC(=O)Nc1ccccc1	-3.001	1
CC(C)OC(=O)c1ccccc1C(=O)OC(C)C	-2.877	1
CC(C)OC(C)(C)C	-2.366	1
CC(C)OC(C)C	-1.708	1
CC(C)OC=O	-0.629	1
CC(C)OCCO	0.982	1
CC(C)OP(=O)(OC(C)C)SCc1ccccc1	-2.858	1
CC(C)OP(C)(=O)OC(C)C	-0.052	1
CC(C)Oc1cc(-n2nc(C(C)(C)C)oc2=O)c(Cl)cc1Cl	-5.693	1
CC(C)Oc1cccc(NC(=O)c2ccccc2C(F)(F)F)c1	-4.532	1
CC(C)[N+](=O)[O-]	-0.615	1
CC(C)c1ccc(C(=O)O)cc1	-3.036	1
CC(C)c1ccc(NC(=O)N(C)C)cc1	-3.536	1
CC(C)c1ccc2ccccc2c1	-5.298	1
CC(C)c1ccccc1	-3.292	1
CC(CC(=O)O)C(=O)O	0.703	1
CC(CCC(=O)O)C1CCC2C3CCC4CC(O)CCC4(C)C3CCC12C	-6	1
CC(CCl)OC(C)CCl	-2.003	1
CC(CN1c2ccccc2Sc2ccccc21)N(C)C	-4.26	1
CC(Cc1ccc(C(C)(C)C)cc1)CN1CC(C)OC(C)C1	-3.637	1
CC(Cl)(Cl)C(=O)O	0.545	1
CC(Cl)(Cl)Cl	-1.952	1
CC(Cl)=CC(=O)O	-0.605	1
CC(Cl)C(C)Cl	-2.354	1
CC(Cl)CCl	-1.606	1
CC(Cl)Cl	-1.291	1
CC(F)F	-1.315	1
CC(N)=O	1.581	1
CC(N)=S	0.336	1
CC(N)C(=O)O	0.27	1
CC(N)CC(=O)O	0.987	1
CC(N)c1ccccc1	-0.46	1
CC(O)C(=O)O	1.045	1
CC(O)C(C)(C)C	-0.624	1
CC(O)C(C)O	1.045	1
CC(O)C(Cl)(Cl)Cl	-0.757	1
CC(O)C(N)C(=O)O	-0.089	1
CC(O)CNCC(C)O	0.815	1
CC(O)CO	1.119	1
CC(OP(C)(=O)F)C(C)(C)C	-0.938	1
CC(Oc1cc(Cl)c(Cl)cc1Cl)C(=O)O	-3.579	1
CC(Oc1ccc(Cl)cc1Cl)C(=O)O	-2.827	1
CC1(C)C(C(=O)OC(C#N)c2cccc(Oc3ccccc3)c2)C1(C)C	-6.025	1
CC1(C)C(C=C(Br)Br)C1C(=O)OC(C#N)c1cccc(Oc2ccccc2)c1	-8.402	1
CC1(C)C(C=C(Cl)Cl)C1C(=O)OC(C#N)c1cccc(Oc2ccccc2)c1	-8.017	1
CC1(C)C(C=C(Cl)Cl)C1C(=O)OCc1cccc(Oc2ccccc2)c1	-6.99	1
CC1(C)C2CCC1(C)C(O)C2	-2.319	1
CC1(C)Cc2cccc([N+](=O)[O-])c2O1	-3.207	1
CC1(O)CCC(C(C)(C)O)CC1	-1.634	1
CC12C(=O)OC(=O)C1(C)C1CCC2O1	-3.816	1
CC12C=CC(=O)C=C1CCC1C2C(O)CC2(C)C1CCC2(O)C(=O)CO	-3.209	1
CC12C=CC(=O)C=C1CCC1C3CC(O)C(O)(C(=O)CO)C3(C)CC(O)C12F	-3.693	1
CC12CC1(C)C(=O)N(c1cc(Cl)cc(Cl)c1)C2=O	-4.8	1
CC12CCC(=O)C=C1CCC1C2C(=O)CC2(C)C1CCC2(O)C(=O)CO	-3.11	1
CC12CCC(=O)C=C1CCC1C2C(O)CC2(C)C(C(=O)CO)CCC12	-3.241	1
CC12CCC(=O)C=C1CCC1C2C(O)CC2(C)C1CCC2(O)C(=O)CO	-3.054	1
CC12CCC(=O)C=C1CCC1C2CCC2(C)C(C(=O)CO)CCC12	-3.745	1
CC12CCC(=O)C=C1CCC1C2CCC2(C)C(O)CCC12	-4.091	1
CC12CCC(=O)C=C1CCC1C2CCC2(C)C1CCC2(C)O	-3.95	1
CC12CCC(C1)C(C)(C)C2=O	-1.85	1
CC12CCC(CC1)C(C)(C)O2	-1.887	1
CC12CCC3C(=CCc4cc(O)ccc43)C1CCC2=O	-5.279	1
CC12CCC3C(CC=C4CC(O)CCC43C)C1CCC2=O	-4.122	1
CC12CCC3C(CCC4=CC(=O)CCC43C)C1CCC2=O	-3.695	1
CC12CCC3C(CCC4CC(O)CCC43C)C1CCC2=O	-4.402	1
CC12CCC3C(CCC4CC5SC5CC43C)C1CCC2O	-5.407	1
CC12CCC3c4ccc(O)cc4CCC3C1CCC2=O	-3.955	1
CC12CCc3c(ccc4cc(O)ccc34)C1CCC2=O	-5.244	1
CC1=C(C(=O)Nc2ccccc2)CCCO1	-2.559	1
CC1=C(C(=O)Nc2ccccc2)S(=O)(=O)CCO1	-2.427	1
CC1=C(C(=O)Nc2ccccc2)SCCO1	-3.141	1
CC1=C(C(=O)O)N2C(=O)C(NC(=O)C(N)C3=CCC=CC3)C2SC1	-1.215	1
CC1=C(CC(=O)O)c2cc(F)ccc2C1=Cc1ccc([S+](C)[O-])cc1	-4.552	1
CC1=C2C3OC(=O)C(C)C3CCC2(C)C=CC1=O	-3.09	1
CC1=CC(=O)CC(C)(C)C1	-1.061	1
CC1=CC(=O)c2ccccc2C1=O	-3.032	1
CC1=CCC(=O)O1	-0.293	1
CC1=CCC(C(C)(C)O)CC1	-1.889	1
CC1=CCCCC1	-3.267	1
CC1CC(C)C(=O)C(C(O)CC2CC(=O)NC(=O)C2)C1	-1.127	1
CC1CC2C(C(O)CC3(C)C2CCC3(O)C(=O)CO)C2(C)C=CC(=O)C=C12	-3.494	1
CC1CC2C3CCC4=CC(=O)C=CC4(C)C3(F)C(O)CC2(C)C1(O)C(=O)CO	-3.7075	1
CC1CCC(C(C)C)C(=O)C1	-2.492	1
CC1CCC(C(C)C)C(O)C1	-2.535	1
CC1CCC(C)(C)C1	-4.478	1
CC1CCC(C)CC1	-4.466	1
CC1CCC(O)CC1	-0.882	1
CC1CCCC(=O)C1	-1.874	1
CC1CCCC(C)(C)C1	-4.853	1
CC1CCCC1	-3.302	1
CC1CCCCC1	-3.788	1
CC1CCCCC1C	-3.95933	1
CC1CCCCC1NC(=O)Nc1ccccc1	-4.111	1
CC1CCCO1	0.31	1
CC1CCOC1	0.09	1
CC1CN(N=O)CC(C)O1	-0.065	1
CC1CNC(C)CN1	0.486	1
CC1CNCCN1	0.638	1
CC1CO1	1.007	1
CC1COC(=O)O1	0.234	1
CC1OC(C)OC(C)O1	-0.072	1
CC=C(C)C	-2.56	1
CC=CC#N	-0.429	1
CC=CC(=O)O	0	1
CC=CC=CC(=O)O	-1.652	1
CC=CC=O	0.33	1
CC=CCC	-2.538	1
CC=CCCCC	-3.816	1
CC=CCCl	-1.957	1
CC=Cc1ccc(OC)cc1	-3.126	1
CC=O	1.356	1
CCBr	-1.086	1
CCC#CC(C)C	-2.745	1
CCC#CCC	-2.167	1
CCC#N	0.272	1
CCC(=C(CC)c1ccc(O)cc1)c1ccc(O)cc1	-4.35	1
CCC(=O)C(C)C	-0.81	1
CCC(=O)CC	-0.253	1
CCC(=O)N(c1ccccc1)C1(COC)CCN(CCc2cccs2)CC1	-3.706	1
CCC(=O)Nc1ccc(Cl)c(Cl)c1	-2.986	1
CCC(=O)O	1.13	1
CCC(=O)OC	-0.15	1
CCC(=O)OC(C)C	-1.29	1
CCC(=O)OC1CCC2C3CCC4=CC(=O)CCC4(C)C3CCC12C	-5.367	1
CCC(=O)c1ccc(N)cc1	-2.627	1
CCC(=O)c1ccccc1	-1.827	1
CCC(Br)(CC)C(=O)NC(N)=O	-2.676	1
CCC(C(=O)O)C(=O)O	0.732	1
CCC(C)(C)C	-3.671	1
CCC(C)(C)CC	-4.229	1
CCC(C)(C)CO	-1.129	1
CCC(C)(C)O	0.096	1
CCC(C)(C)c1ccc(O)cc1	-2.99	1
CCC(C)(C)c1ccccc1	-4.15	1
CCC(C)(CC)OC(N)=O	-1.56	1
CCC(C)(O)C(C)C	-0.85	1
CCC(C)(O)CC	-0.38	1
CCC(C)(S(=O)(=O)CC)S(=O)(=O)CC	-1.685	1
CCC(C)=O	0.49	1
CCC(C)C	-3.163	1
CCC(C)C(C)(C)C	-4.678	1
CCC(C)C(C)(COC(N)=O)COC(N)=O	-2.366	1
CCC(C)C(C)=O	-0.681	1
CCC(C)C(C)C	-4.281	1
CCC(C)C(C)O	-0.722	1
CCC(C)C(N)C(=O)O	-0.581	1
CCC(C)C(O)C(C)CC	-2.51	1
CCC(C)CC	-3.683	1
CCC(C)CCO	-1.376	1
CCC(C)CO	-0.472	1
CCC(C)Cl	-1.966	1
CCC(C)N	0.185	1
CCC(C)N(C(=O)SCc1ccccc1)C(C)CC	-5.048	1
CCC(C)Nc1c([N+](=O)[O-])cc(C(C)(C)C)cc1[N+](=O)[O-]	-5.47	1
CCC(C)O	0.388	1
CCC(C)OC	-0.73	1
CCC(C)OC(C)=O	-1.273	1
CCC(C)c1cc([N+](=O)[O-])cc([N+](=O)[O-])c1O	-3.665	1
CCC(C)c1ccc(O)cc1	-2.194	1
CCC(C)c1ccccc1	-3.882	1
CCC(C)c1ccccc1OC(=O)NC	-2.497	1
CCC(C)n1c(=O)[nH]c(C)c(Br)c1=O	-2.506	1
CCC(CC)C(=O)O	-0.81	1
CCC(CC)CO	-1.407	1
CCC(CC)Nc1c([N+](=O)[O-])cc(C)c(C)c1[N+](=O)[O-]	-5.972	1
CCC(Cl)CC	-2.63	1
CCC(Cl)[N+](=O)[O-]	-1.189	1
CCC(N)Cc1c[nH]c2ccccc12	-2.567	1
CCC(O)(CC)CC	-0.84	1
CCC(O)C(C)(C)C	-1.151	1
CCC(O)C(C)C	-0.706	1
CCC(O)CC	-0.233	1
CCC(c1ccc(O)cc1)C(CC)c1ccc(O)cc1	-4.353	1
CCC1(C(C)C)C(=O)NC(=O)NC1=O	-2.214	1
CCC1(C2=CCCCC2)C(=O)NC(=O)NC1=O	-2.169	1
CCC1(C2=CCCCCC2)C(=O)NC(=O)NC1=O	-3.001	1
CCC1(CC)C(=O)NC(=O)N(C)C1=O	-2	1
CCC1(CC)C(=O)NC(=O)NC1=O	-1.393	1
CCC1(CCC(C)C)C(=O)NC(=O)NC1=O	-2.574	1
CCC1(c2ccccc2)C(=O)NC(=O)NC1=O	-2.321	1
CCC1(c2ccccc2)C(=O)NCNC1=O	-2.64	1
CCC1(c2ccccc2)CCC(=O)NC1=O	-2.337	1
CCC1CO1	-0.086	1
CCC1COC(Cn2cncn2)(c2ccc(Cl)cc2Cl)O1	-3.613	1
CCC1NC(=O)c2cc(S(N)(=O)=O)c(Cl)cc2N1	-3.286	1
CCC=O	0.722	1
CCCBr	-1.701	1
CCCC	-2.978	1
CCCC#N	-0.321	1
CCCC(=O)CC	-0.833	1
CCCC(=O)CCC	-1.552	1
CCCC(=O)O	1.055	1
CCCC(=O)OC	-0.833	1
CCCC(=O)OCC	-1.275	1
CCCC(C)(C)C	-4.357	1
CCCC(C)(C)C(=O)Nc1ccc(Cl)cc1	-4.022	1
CCCC(C)(C)CO	-1.52	1
CCCC(C)(C)O	-0.499	1
CCCC(C)(COC(N)=O)COC(=O)NC(C)C	-2.938	1
CCCC(C)(COC(N)=O)COC(N)=O	-1.667	1
CCCC(C)(O)CC	-1.001	1
CCCC(C)=O	-0.302	1
CCCC(C)C	-3.74	1
CCCC(C)C(=O)Nc1ccc(C)c(Cl)c1	-4.45	1
CCCC(C)C1(CC)C(=O)N=C(O)NC1=O	-2.523	1
CCCC(C)CC	-4.306	1
CCCC(C)CO	-1.231	1
CCCC(C)Cl	-2.63	1
CCCC(C)O	-0.296	1
CCCC(CC)(CC)CO	-2.419	1
CCCC(CCC)C(=O)O	-1.858	1
CCCC(Cl)Cl	-2.4	1
CCCC(N)=O	0.272	1
CCCC(O)C(C)C	-1.32	1
CCCC(O)C(CC)CO	-1.387	1
CCCC(O)CC	-0.803	1
CCCC(O)CCC	-1.393	1
CCCC1(CCC)C(=O)NC(=O)NC1=O	-2.549	1
CCCC1CCCCN1	-0.849	1
CCCC1COC(Cn2cncn2)(c2ccc(Cl)cc2Cl)O1	-3.493	1
CCCC=O	-0.007	1
CCCCBr	-2.198	1
CCCCC	-3.278	1
CCCCC(=O)CC	-0.902	1
CCCCC(=O)CCCC	-2.593	1
CCCCC(=O)O	-0.416	1
CCCCC(=O)OCC	-1.77	1
CCCCC(C)(C)CCC	-4.811	1
CCCCC(C)(C)O	-1.078	1
CCCCC(C)(O)CC	-1.6	1
CCCCC(C)=O	-0.758	1
CCCCC(C)C	-4.596	1
CCCCC(C)CC	-5.159	1
CCCCC(C)O	-0.873	1
CCCCC(CC)C(=O)O	-1.858	1
CCCCC(CC)CCl	-3.172	1
CCCCC(CC)CN	-1.713	1
CCCCC(CC)CO	-2.27	1
CCCCC(CC)COC(=O)c1ccccc1C(=O)OCC(CC)CCCC	-6.968	1
CCCCC(O)CCCC	-2.49	1
CCCCC1(CC)C(=O)NC(=O)NC1=O	-1.638	1
CCCCC1C(=O)N(c2ccccc2)N(c2ccc(O)cc2)C1=O	-3.733	1
CCCCC1C(=O)N(c2ccccc2)N(c2ccccc2)C1=O	-3.812	1
CCCCC=O	-0.867	1
CCCCCBr	-3.075	1
CCCCCC	-3.958	1
CCCCCC(=O)O	-1.052	1
CCCCCC(=O)OC	-1.991	1
CCCCCC(=O)OCC	-2.36	1
CCCCCC(C)(C)O	-1.72	1
CCCCCC(C)=O	-1.424	1
CCCCCC(C)O	-1.551	1
CCCCCC=O	-1.249	1
CCCCCCBr	-3.808	1
CCCCCCC	-4.469	1
CCCCCCC(=O)O	-1.664	1
CCCCCCC(=O)OCC	-2.737	1
CCCCCCC(C)=O	-2.154	1
CCCCCCC=O	-1.961	1
CCCCCCCBr	-4.431	1
CCCCCCCC	-5.238	1
CCCCCCCC(=O)O	-2.262	1
CCCCCCCC(=O)OC	-3.39	1
CCCCCCCC(=O)OCC	-3.391	1
CCCCCCCC(C)=O	-2.584	1
CCCCCCCC(C)O	-2.744	1
CCCCCCCC=O	-2.36	1
CCCCCCCCBr	-5.063	1
CCCCCCCCC	-5.766	1
CCCCCCCCC#N	-3.299	1
CCCCCCCCC(=O)O	-2.746	1
CCCCCCCCC(=O)OC	-3.876	1
CCCCCCCCC(=O)OCC	-3.8	1
CCCCCCCCC(C)=O	-3.309	1
CCCCCCCCC=O	-3.171	1
CCCCCCCCCC(=O)O	-3.445	1
CCCCCCCCCC(=O)OC	-4.627	1
CCCCCCCCCC(=O)OCC	-4.1	1
CCCCCCCCCC(C)O	-2.94	1
CCCCCCCCCCC(=O)O	-3.553	1
CCCCCCCCCCCC	-6.41	1
CCCCCCCCCCCC(=O)O	-3.561	1
CCCCCCCCCCCCC(=O)O	-3.813	1
CCCCCCCCCCCCCC	-7.456	1
CCCCCCCCCCCCCC(=O)O	-5.329	1
CCCCCCCCCCCCCCCC(=O)O	-6.807	1
CCCCCCCCCCCCCCCCCCO	-8.391	1
CCCCCCCCCCCCCCCCCO	-7.506	1
CCCCCCCCCCCCCCCCO	-7.258	1
CCCCCCCCCCCCCCCO	-6.35	1
CCCCCCCCCCCCCCO	-5.854	1
CCCCCCCCCCCCN1CC(C(=O)OC)CC1=O	-4.376	1
CCCCCCCCCCCCN1CCCC1=O	-4.67	1
CCCCCCCCCCCCO	-4.668	1
CCCCCCCCCCO	-3.631	1
CCCCCCCCCO	-3.013	1
CCCCCCCCCOC(=O)c1ccc(N)cc1	-6.001	1
CCCCCCCCCc1ccc(OP(=O)(Oc2ccccc2)Oc2ccccc2)cc1	-5.769	1
CCCCCCCCO	-2.382	1
CCCCCCCCOC(=O)c1ccc(N)cc1	-5.4	1
CCCCCCCCc1ccccc1	-6.46	1
CCCCCCCCl	-3.996	1
CCCCCCCO	-1.842	1
CCCCCCCOC(=O)c1ccc(N)cc1	-4.6	1
CCCCCCCOC(=O)c1ccc(O)cc1	-4.072	1
CCCCCCN	-0.926	1
CCCCCCN1CC(C(=O)O)CC1=O	-1.456	1
CCCCCCO	-1.239	1
CCCCCCOC(=O)c1ccc(O)cc1	-3.949	1
CCCCCCOC(C)=O	-2.451	1
CCCCCCOCCO	-1.169	1
CCCCCCc1ccc(O)cc1O	-2.589	1
CCCCCCc1ccccc1	-5.255	1
CCCCCN	1.06	1
CCCCCO	-0.603	1
CCCCCOC(=O)CCC	-2.467	1
CCCCCOC(C)=O	-1.877	1
CCCCCl	-1.925	1
CCCCN	1.136	1
CCCCN(C)C(=O)Nc1ccc(Cl)c(Cl)c1	-4.758	1
CCCCN(C)N=O	-0.7	1
CCCCN(CC)N=O	-1.035	1
CCCCN(CC)c1c([N+](=O)[O-])cc(C(F)(F)F)cc1[N+](=O)[O-]	-6.525	1
CCCCN(CCCC)CCCC	-3.116	1
CCCCN(CCCC)N=O	-2.096	1
CCCCNC(=O)NS(=O)(=O)c1ccc(C)cc1	-3.394	1
CCCCNC(=O)NS(=O)(=O)c1ccc(N)cc1	-2.178	1
CCCCNC(=O)n1c(NC(=O)OC)nc2ccccc21	-4.883	1
CCCCNC(=O)n1cc(F)c(=O)[nH]c1=O	-2.446	1
CCCCNCCCC	-1.439	1
CCCCO	-0.069	1
CCCCOC	-0.99	1
CCCCOC(=O)C(C)O	-0.563	1
CCCCOC(=O)C(C)Oc1ccc(Oc2ccc(C(F)(F)F)cn2)cc1	-5.584	1
CCCCOC(=O)C1(O)c2ccccc2-c2ccccc21	-3.888	1
CCCCOC(=O)CC	-1.938	1
CCCCOC(=O)CCC	-2.46	1
CCCCOC(=O)N(C)SN(C)C(=O)Oc1cccc2c1OC(C)(C)C2	-4.583	1
CCCCOC(=O)c1ccc(N)cc1	-2.755	1
CCCCOC(=O)c1ccc(O)cc1	-2.972	1
CCCCOC(=O)c1ccccc1	-3.48	1
CCCCOC(=O)c1ccccc1C(=O)OCCCC	-4.395	1
CCCCOC(=O)c1ccccc1C(=O)OCc1ccccc1	-5.065	1
CCCCOC(C)=O	-1.141	1
CCCCOC(N)=O	-0.657	1
CCCCOC=O	-1.131	1
CCCCOCC1CO1	-0.814	1
CCCCOCCCC	-2.638	1
CCCCOCCO	0.927	1
CCCCOCCOCCCC	-1.94	1
CCCCOCCOCCOC(C)=O	-0.497	1
CCCCOCCOCCOCCCC	-1.862	1
CCCCOCN(C(=O)CCl)c1c(CC)cccc1CC	-4.193	1
CCCCOP(=O)(OCCCC)OCCCC	-2.978	1
CCCCOP(=O)(OCCCC)Oc1ccccc1	-3.475	1
CCCCS	-2.179	1
CCCCSP(=O)(SCCCC)SCCCC	-5.634	1
CCCC[N+](=O)[O-]	-1.351	1
CCCCc1c(C)nc(N(C)C)nc1O	-2.242	1
CCCCc1c(C)nc(NCC)nc1O	-3.02	1
CCCCc1ccccc1	-4.056	1
CCCCl	-1.461	1
CCCN	1.228	1
CCCN(CC1CC1)c1c([N+](=O)[O-])cc(C(F)(F)F)cc1[N+](=O)[O-]	-6.541	1
CCCN(CCC)C(=O)SCC	-2.703	1
CCCN(CCC)CCC	-2.282	1
CCCN(CCC)N=O	-1.001	1
CCCN(CCC)c1c([N+](=O)[O-])cc(C(C)C)cc1[N+](=O)[O-]	-6.49	1
CCCN(CCC)c1c([N+](=O)[O-])cc(C(F)(F)F)c(N)c1[N+](=O)[O-]	-7.43	1
CCCN(CCC)c1c([N+](=O)[O-])cc(C(F)(F)F)cc1[N+](=O)[O-]	-6.048	1
CCCN(CCC)c1c([N+](=O)[O-])cc(S(C)(=O)=O)cc1[N+](=O)[O-]	-5.76	1
CCCN(CCC)c1c([N+](=O)[O-])cc(S(N)(=O)=O)cc1[N+](=O)[O-]	-3.61	1
CCCN(CCCl)c1c([N+](=O)[O-])cc(C(F)(F)F)cc1[N+](=O)[O-]	-4.551	1
CCCN(CCOc1c(Cl)cc(Cl)cc1Cl)C(=O)n1ccnc1	-4.044	1
CCCNC(=O)COC(=O)c1ccccc1	-2.539	1
CCCNC(=O)NS(=O)(=O)c1ccc(Cl)cc1	-3.03	1
CCCNCCC	-0.237	1
CCCO	1.221	1
CCCOC	-0.386	1
CCCOC(=O)CC	-1.34	1
CCCOC(=O)CCC	-1.905	1
CCCOC(=O)c1cc(O)c(O)c(O)c1	-1.783	1
CCCOC(=O)c1ccc(N)cc1	-2.328	1
CCCOC(=O)c1ccc(O)cc1	-2.557	1
CCCOC(=O)c1ccccc1C(=O)OCCC	-3.365	1
CCCOC(C)=O	-0.733	1
CCCOC(C)C	-1.337	1
CCCOC(N)=O	-0.13	1
CCCOC=O	-0.603	1
CCCOCC	-0.845	1
CCCOCCC	-1.319	1
CCCOCCN(C(=O)CCl)c1c(CC)cccc1CC	-3.795	1
CCCOP(=O)(OCCC)Oc1ccc(SC)cc1	-3.386	1
CCCOP(=S)(OCCC)SCC(=O)N1CCCCC1C	-4.15	1
CCCOc1ccc([N+](=O)[O-])cc1N	-3.159	1
CCCSP(=O)(OCC)Oc1ccc(Br)cc1Cl	-4.125	1
CCCSP(=O)(OCC)SCCC	-2.509	1
CCC[N+](=O)[O-]	-0.774	1
CCCc1ccccc1	-3.362	1
CCCl	-1.055	1
CCN	1.346	1
CCN(C)CC	0.713	1
CCN(C)N=O	0.532	1
CCN(CC)C(=O)C(C)Oc1cccc2ccccc12	-3.57	1
CCN(CC)C(=O)CC(C)C	-0.595	1
CCN(CC)C(=O)COC(=O)c1ccccc1	-2.071	1
CCN(CC)C(=O)CSc1ccc(Cl)nn1	-1.716	1
CCN(CC)C(=O)SCc1ccc(Cl)cc1	-3.964	1
CCN(CC)C(=O)c1cccnc1	0.749	1
CCN(CC)C(=S)SSC(=S)N(CC)CC	-4.86	1
CCN(CC)CC	-0.138	1
CCN(CC)CC(=O)Nc1c(C)cccc1C	-1.757	1
CCN(CC)CCNC(=O)c1cc(Cl)c(N)cc1OC	-3.176	1
CCN(CC)CCOC(=O)c1ccc(N)cc1	-1.398	1
CCN(CC)N=O	0.016	1
CCN(CC)c1c([N+](=O)[O-])cc(C(F)(F)F)c(N)c1[N+](=O)[O-]	-5.467	1
CCN(CC)c1ccccc1	-3.028	1
CCN(CC)c1nc(C)cc(OP(=S)(OC)OC)n1	-4.133	1
CCN(CC)c1nc(Cl)nc(NC(C)C)n1	-3.785	1
CCN(CCO)c1ccc(N=Nc2ccc([N+](=O)[O-])cc2)cc1	-6.293	1
CCN(Cc1c(F)cccc1Cl)c1c([N+](=O)[O-])cc(C(F)(F)F)cc1[N+](=O)[O-]	-6.625	1
CCN(N=O)C(N)=O	-0.955	1
CCNC(=O)C(C)OC(=O)Nc1ccccc1	-1.829	1
CCNC(=O)COC(=O)c1ccccc1	-2.237	1
CCNC(=O)CSP(=S)(OC)OC	-1.457	1
CCNC(=O)Nc1ncc([N+](=O)[O-])s1	-2.858	1
CCNCC	1.136	1
CCNc1nc(Cl)nc(N(CC)CC)n1	-4.06	1
CCNc1nc(Cl)nc(NC(C)(C)C#N)n1	-3.151	1
CCNc1nc(Cl)nc(NC(C)(C)C)n1	-4.402	1
CCNc1nc(Cl)nc(NC(C)C)n1	-3.887	1
CCNc1nc(Cl)nc(NCC(=O)OCC)n1	-2.937	1
CCNc1nc(Cl)nc(NCC)n1	-4.549	1
CCNc1nc(NC(C)(C)C)nc(OC)n1	-3.239	1
CCNc1nc(NC(C)(C)C)nc(SC)n1	-3.985	1
CCNc1nc(NC(C)C(C)C)nc(SC)n1	-3.708	1
CCNc1nc(NC(C)C)nc(SC)n1	-3.037	1
CCNc1nc(NC(C)CC)nc(OC)n1	-2.575	1
CCO	1.337	1
CCOC(=O)C(C)N(C(=O)c1ccccc1)c1ccc(Cl)c(Cl)c1	-4.263	1
CCOC(=O)C(C)Oc1ccc(Oc2cnc3cc(Cl)ccc3n2)cc1	-6.094	1
CCOC(=O)C(C)Oc1ccc(Oc2nc3ccc(Cl)cc3o2)cc1	-5.569	1
CCOC(=O)C(O)(c1ccc(Cl)cc1)c1ccc(Cl)cc1	-4.512	1
CCOC(=O)C(SP(=S)(OC)OC)c1ccccc1	-3.205	1
CCOC(=O)C(c1c(O)c2ccccc2oc1=O)c1c(O)c2ccccc2oc1=O	-3.426	1
CCOC(=O)C1(c2ccccc2)CCN(C)CC1	-1.885	1
CCOC(=O)C=C(C)C=CCC(C)CCCC(C)C	-5.693	1
CCOC(=O)C=Cc1ccccc1	-2.996	1
CCOC(=O)CC	-0.726	1
CCOC(=O)CC#N	-0.753	1
CCOC(=O)CC(=O)OCC	-0.839	1
CCOC(=O)CC(C)=O	-0.073	1
CCOC(=O)CC(C)C	-1.652	1
CCOC(=O)CC(O)(CC(=O)OCC)C(=O)OCC	-0.603	1
CCOC(=O)CC(SP(=S)(OC)OC)C(=O)OCC	-3.364	1
CCOC(=O)CCC(=O)OCC	-0.96	1
CCOC(=O)CCCC(=O)OCC	-1.33	1
CCOC(=O)CCCCC(=O)OCC	-1.68	1
CCOC(=O)CCCCCC(=O)OCC	-2.013	1
CCOC(=O)CCCCCCC(=O)OCC	-2.53	1
CCOC(=O)CCCCCCCCC(=O)OCC	-3.51	1
CCOC(=O)CN(C(=O)CCl)c1c(CC)cccc1CC	-3.473	1
CCOC(=O)CNc1nc(Cl)nc(NC(C)C)n1	-2.562	1
CCOC(=O)NC	0.826	1
CCOC(=O)NCC(C)C	-0.768	1
CCOC(=O)NCCOc1ccc(Oc2ccccc2)cc1	-4.701	1
CCOC(=O)Nc1cccc(OC(=O)Nc2ccccc2)c1	-4.632	1
CCOC(=O)OCC	-0.798	1
CCOC(=O)c1ccc(N)cc1	-2.101	1
CCOC(=O)c1ccc(O)cc1	-2.309	1
CCOC(=O)c1ccccc1	-2.319	1
CCOC(=O)c1ccccc1C(=O)OCC	-2.313	1
CCOC(C)=O	-0.042	1
CCOC(C)C	-0.551	1
CCOC(C)OCC	-0.429	1
CCOC(N)=O	0.731	1
CCOC1CC1	-0.641	1
CCOC1Oc2ccc(OS(C)(=O)=O)cc2C1(C)C	-3.416	1
CCOC=O	0.076	1
CCOCC	-0.089	1
CCOCCO	1.045	1
CCOCCOC(=O)C=Cc1ccc(OC)cc1	-2.699	1
CCOCCOC(C)=O	0.272	1
CCOCCOCC	-0.15	1
CCOCCOCCO	0.872	1
CCOCCOCCOCC	0.79	1
CCOCOCC	-0.173	1
CCON=C(CC)C1=C(O)CC(c2c(C)cc(C)cc2C)CC1=O	-4.74	1
CCOP(=O)(NC(C)C)Oc1ccc(SC)c(C)c1	-2.965	1
CCOP(=O)(OCC)OC(=CCl)c1ccc(Cl)cc1Cl	-3.462	1
CCOP(=O)(OCC)OCC	0.439	1
CCOP(=O)(OCC)Oc1ccc([N+](=O)[O-])cc1	-2.059	1
CCOP(=O)(OCC)SCC(=O)NC(C)(C)C#N	-0.624	1
CCOP(=O)(OCC)SCCSCC	-2.111	1
CCOP(=O)(OCC)SC[S+]([O-])CC	-1.512	1
CCOP(=O)(OCC)SCn1nnc2ccccc2c1=O	-1.993	1
CCOP(=O)(Oc1ccc(Cl)cc1Cl)Oc1ccc(Cl)cc1Cl	-5.774	1
CCOP(=O)(Sc1ccccc1)Sc1ccccc1	-3.331	1
CCOP(=S)(CC)Oc1cc(Cl)c(Cl)cc1Cl	-5.752	1
CCOP(=S)(CC)Sc1ccccc1	-4.159	1
CCOP(=S)(NC(C)C)Oc1ccccc1C(=O)OC(C)C	-4.194	1
CCOP(=S)(NC(C)CC)Oc1cc(C)ccc1[N+](=O)[O-]	-4.814	1
CCOP(=S)(OCC)N1C(=O)c2ccccc2C1=O	-3.352	1
CCOP(=S)(OCC)OCCSCC	-3.634	1
CCOP(=S)(OCC)ON=C(C#N)c1ccccc1	-4.63	1
CCOP(=S)(OCC)Oc1cc(C)nc(C(C)C)n1	-3.881	1
CCOP(=S)(OCC)Oc1cc(C)nc(N(CC)CC)n1	-4.924	1
CCOP(=S)(OCC)Oc1cc(Cl)c(Br)cc1Cl	-5.952	1
CCOP(=S)(OCC)Oc1ccc(S(C)(=O)=O)cc1	-2.638	1
CCOP(=S)(OCC)Oc1ccc([N+](=O)[O-])cc1	-4.649	1
CCOP(=S)(OCC)Oc1ccc([S+](C)[O-])cc1	-2.188	1
CCOP(=S)(OCC)Oc1ccc2c(C)c(Cl)c(=O)oc2c1	-5.384	1
CCOP(=S)(OCC)Oc1cnc2ccccc2n1	-4.132	1
CCOP(=S)(OCC)Oc1cnccn1	-2.338	1
CCOP(=S)(OCC)Oc1nc(Cl)c(Cl)cc1Cl	-5.496	1
CCOP(=S)(OCC)Oc1nc(Cl)n(C(C)C)n1	-3.32	1
CCOP(=S)(OCC)Oc1ncn(-c2ccccc2)n1	-4.102	1
CCOP(=S)(OCC)SC(CCl)N1C(=O)c2ccccc2C1=O	-6.34	1
CCOP(=S)(OCC)SCC(=O)NC(C)C	-2.057	1
CCOP(=S)(OCC)SCCS(=O)(=O)CC	-2.54	1
CCOP(=S)(OCC)SCCSCC	-4.226	1
CCOP(=S)(OCC)SCC[S+]([O-])CC	-1.861	1
CCOP(=S)(OCC)SCS(=O)(=O)C(C)(C)C	-2.895	1
CCOP(=S)(OCC)SCSC(C)(C)C	-4.755	1
CCOP(=S)(OCC)SCSCC	-3.717	1
CCOP(=S)(OCC)SCSP(=S)(OCC)OCC	-5.284	1
CCOP(=S)(OCC)SCSc1ccc(Cl)cc1	-5.736	1
CCOP(=S)(OCC)SC[S+]([O-])C(C)(C)C	-2.442	1
CCOP(=S)(OCC)SCn1c(=O)oc2cc(Cl)ccc21	-5.233	1
CCOP(=S)(OCC)SCn1nnc2ccccc2c1=O	-4.517	1
CCOP(=S)(Oc1ccc(C#N)cc1)c1ccccc1	-5.704	1
CCOP(=S)(Oc1ccc([N+](=O)[O-])cc1)c1ccccc1	-5.017	1
CCOS(=O)(=O)OCC	-1.343	1
CCOS(C)(=O)=O	0.402	1
CCOc1cc(Oc2ccc(C(F)(F)F)cc2Cl)ccc1[N+](=O)[O-]	-6.558	1
CCOc1ccc(C(=O)OCCN(CC)CC)cc1	-2.715	1
CCOc1ccc(NC(C)=O)cc1	-2.369	1
CCOc1ccc(NC(N)=O)cc1	-2.173	1
CCOc1ccc(NS(=O)(=O)c2ccc(N)cc2)nn1	-2.427	1
CCOc1ccc2nc(S(N)(=O)=O)sc2c1	-3.81	1
CCOc1ccccc1	-2.332	1
CCS	-0.6	1
CCS(=O)(=O)C(C)(C)S(=O)(=O)CC	-1.927	1
CCS(=O)(=O)CC	0.043	1
CCS(=O)(=O)c1nnc(N(C)C(=O)NC)s1	-1.945	1
CCSC(=O)N1CCCCCC1	-2.286	1
CCSCC	-1.46	1
CCSCc1ccccc1OC(=O)NC	-2.093	1
CCSc1nc(NC(C)C)nc(NC(C)C)n1	-4.203	1
CC[N+](=O)[O-]	-0.203	1
CC[S+]([O-])CSP(=S)(OC(C)C)OC(C)C	-2.307	1
CCc1ccc(C)cc1	-3.103	1
CCc1ccc(CC)cc1	-3.733	1
CCc1ccc(O)cc1	-1.475	1
CCc1ccc2cc3ccccc3cc2c1	-6.886	1
CCc1ccc2ccccc2c1	-4.29	1
CCc1cccc(C)c1N(C(=O)CCl)C(C)COC	-2.729	1
CCc1cccc(CC)c1	-3.748	1
CCc1cccc(CC)c1N	-2.348	1
CCc1cccc(CC)c1N(COC)C(=O)CCl	-3.051	1
CCc1cccc2ccccc12	-4.164	1
CCc1ccccc1	-2.798	1
CCc1ccccc1C	-3.207	1
CCc1ccccc1CC	-3.276	1
CCc1ccccc1NC(C)=O	-1.591	1
CCc1ccccc1O	-1.359	1
CCc1ccccn1	0.501	1
CCc1cccnc1	0.538	1
CCc1cccs1	-2.585	1
CCc1ccncc1	0.827	1
CCc1nnc(NS(=O)(=O)c2ccc(N)cc2)s1	-1.942	1
CCn1c(O)c(N=Nc2ccc(Cl)cc2[N+](=O)[O-])c(C)c(C#N)c1=O	-6.69	1
CN(C)C	1.178	1
CN(C)C(=O)C(c1ccccc1)c1ccccc1	-2.964	1
CN(C)C(=O)COC(=O)c1ccccc1	-1.372	1
CN(C)C(=O)N(C)C	0.935	1
CN(C)C(=O)Nc1ccc(Cl)c(Cl)c1	-3.744	1
CN(C)C(=O)Nc1ccc(Cl)cc1	-2.936	1
CN(C)C(=O)Nc1ccc(Oc2ccc(Cl)cc2)cc1	-4.895	1
CN(C)C(=O)Nc1cccc(C(F)(F)F)c1	-3.436	1
CN(C)C(=O)Nc1ccccc1	-1.61	1
CN(C)C(=O)OC1=CC(=O)CC(C)(C)C1	-0.848	1
CN(C)C=O	1.136	1
CN(C)CCC=C1c2ccccc2CCc2ccccc21	-4.456	1
CN(C)CCC=C1c2ccccc2COc2ccccc21	-3.947	1
CN(C)CCCN1c2ccccc2CCc2ccccc21	-4.187	1
CN(C)CCCN1c2ccccc2Sc2ccc(Cl)cc21	-5.097	1
CN(C)CCCN1c2ccccc2Sc2ccccc21	-4.302	1
CN(C)CCc1ccc(O)cc1	-1.373	1
CN(C)N	1.221	1
CN(C)N=O	1.13	1
CN(C)NC(=O)CCC(=O)O	-0.205	1
CN(C)P(=O)(N(C)C)N(C)C	0.747	1
CN(C)c1ccc(C(=O)O)cc1	-3.398	1
CN(C)c1ccc(N=Nc2ccccc2)cc1	-5.991	1
CN(C)c1ccccc1	-1.922	1
CN(C)c1nc(N(C)C)nc(N(C)C)n1	-3.364	1
CN(Cc1ccccc1)N=O	-1.522	1
CN(N=O)C(N)=O	-0.855	1
CN1C(=O)C(C)(C2=CCCCC2)C(=O)N=C1O	-2.735	1
CN1C(=O)CCS(=O)(=O)C1c1ccc(Cl)cc1	-2.039	1
CN1C(=O)CN=C(c2ccccc2)c2cc(Cl)ccc21	-3.755	1
CN1C2CC(OC(=O)C(CO)c3ccccc3)CC1C1OC12	-0.504	1
CN1C2CCC1CC(OC(=O)C(CO)c1ccccc1)C2	-2.119	1
CN1C2CCC1CC(OC(=O)C(O)c1ccccc1)C2	-1.44	1
CN1CC(=O)NC1=N	-0.15	1
CN1CCC23c4c5ccc(OCc6ccccc6)c4OC2C(O)C=CC3C1C5	-2.973	1
CN1CCCC1=O	1.004	1
CN1CCCC1c1cccnc1	0.79	1
CN1CCCCC1	0.226	1
CN1CCN(C(c2ccccc2)c2ccccc2)CC1	-2.426	1
CN1CCN(CCCN2c3ccccc3Sc3ccc(C(F)(F)F)cc32)CC1	-4.524	1
CN1CCN(CCCN2c3ccccc3Sc3ccc(Cl)cc32)CC1	-4.397	1
CN1CCOCC1	0.995	1
CN1c2ccccc2Sc2ccc(CC(=O)O)cc21	-3.942	1
CN=C(O)Oc1cccc(C)c1	-1.803	1
CN=C=S	-0.983	1
CNC	1.558	1
CNC(=NC#N)NCCSCc1nc[nH]c1C	-1.345	1
CNC(=O)C=C(C)OP(=O)(OC)OC	0.651	1
CNC(=O)COC(=O)c1ccccc1	-1.718	1
CNC(=O)CSP(=S)(OC)OC	-0.962	1
CNC(=O)N(C)c1nc2ccccc2s1	-3.574	1
CNC(=O)N(C)c1nnc(C(C)(C)C)s1	-1.997	1
CNC(=O)N(C)c1nnc(C(F)(F)F)s1	-2.058	1
CNC(=O)ON=C(C)SC	-0.447	1
CNC(=O)ON=C(SC)C(=O)N(C)C	0.106	1
CNC(=O)ON=CC(C)(C)S(C)(=O)=O	-1.347	1
CNC(=O)ON=CC(C)(C)SC	-1.499	1
CNC(=O)Oc1cc(C)c(N(C)C)c(C)c1	-3.347	1
CNC(=O)Oc1cc(C)c(SC)c(C)c1	-4.353	1
CNC(=O)Oc1cc(C)cc(C(C)C)c1	-3.357	1
CNC(=O)Oc1cc(C)cc(C)c1	-2.581	1
CNC(=O)Oc1ccc(C)c(C)c1	-2.139	1
CNC(=O)Oc1ccc(N(C)C)c(C)c1	-2.357	1
CNC(=O)Oc1ccc(SC)c(C)c1	-3.973	1
CNC(=O)Oc1cccc(N=CN(C)C)c1	-1.546	1
CNC(=O)Oc1cccc2c1OC(C)(C)C2	-2.84	1
CNC(=O)Oc1cccc2c1OC(C)(C)O2	-3.747	1
CNC(=O)Oc1cccc2ccccc12	-3.387	1
CNC(=O)Oc1ccccc1C(C)C	-2.684	1
CNC(=O)Oc1ccccc1C1OCCO1	-1.571	1
CNC(=O)Oc1ccccc1OC(C)C	-2.051	1
CNC(=O)Oc1ccccc1OC(CCl)OC	-2.301	1
CNC(=O)n1cc(F)c(=O)[nH]c1=O	-2.48	1
CNC(C)=O	1.136	1
CNC(C)C(O)c1ccccc1	-0.415	1
CNC(N)=O	1.13	1
CNCC(=O)O	0.527	1
CNCC(O)C(O)C(O)C(O)CO	0.709	1
CNCCCN1c2ccccc2CCc2ccccc21	-3.658	1
CNN	1.337	1
CNP(=O)(OC)Oc1ccc(C(C)(C)C)cc1Cl	-3.164	1
CNc1ccccc1	-1.28	1
CNc1ccccc1C(=O)O	-2.878	1
CNc1nc(NC(C)C)nc(SC)n1	-2.566	1
COC	0.884	1
COC(=O)C(C)N(C(=O)Cc1ccccc1)c1c(C)cccc1C	-3.944	1
COC(=O)C(C)N(C(=O)c1ccccc1)c1ccc(F)c(Cl)c1	-3.982	1
COC(=O)C(C)N(C(=O)c1ccco1)c1c(C)cccc1C	-3.117	1
COC(=O)C(C)Oc1ccc(Oc2ccc(Cl)cc2Cl)cc1	-3.834	1
COC(=O)C(Cl)Cc1ccc(Cl)cc1	-3.765	1
COC(=O)C1=CCCN(C)C1	0.809	1
COC(=O)C1C(OC(=O)c2ccccc2)CC2CCC1N2C	-2.227	1
COC(=O)C=CC(=O)OC	-0.256	1
COC(=O)CC(C)=O	0.634	1
COC(=O)NS(=O)(=O)c1ccc(N)cc1	-1.663	1
COC(=O)Nc1cccc(OC(=O)Nc2cccc(C)c2)c1	-4.779	1
COC(=O)Nc1nc2ccccc2[nH]1	-3.834	1
COC(=O)c1c(Cl)c(Cl)c(C(=O)OC)c(Cl)c1Cl	-5.822	1
COC(=O)c1cc(Cl)cc(N)c1Cl	-3.263	1
COC(=O)c1cc(O)c(O)c(O)c1	-1.24	1
COC(=O)c1cc(Oc2ccc(Cl)cc2Cl)ccc1[N+](=O)[O-]	-5.934	1
COC(=O)c1ccc(N)cc1	-1.597	1
COC(=O)c1ccc(O)cc1	-1.784	1
COC(=O)c1ccccc1	-1.812	1
COC(=O)c1ccccc1C(=O)OC	-1.686	1
COC(=O)c1ccccc1CS(=O)(=O)NC(=O)Nc1nc(OC)cc(OC)n1	-3.534	1
COC(=O)c1ccccc1O	-1.313	1
COC(=O)c1ccccc1S(=O)(=O)NC(=O)Nc1nc(C)cc(C)n1	-3.084	1
COC(=O)c1ccccc1S(=O)(=O)NC(=O)Nc1nc(C)nc(OC)n1	-1.604	1
COC(=O)c1cccnc1	-0.46	1
COC(C)(C)C	-0.238	1
COC(C)(C)CCCC(C)CC=CC(C)=CC(=O)OC(C)C	-5.346	1
COC(C)=O	0.516	1
COC(C)C	-0.057	1
COC(N)=O	0.964	1
COC1=CC(=O)CC(C)C12Oc1c(Cl)c(OC)cc(OC)c1C2=O	-4.611	1
COC1OC(CO)C(O)C(O)C1O	0.299	1
COC=O	0.704	1
COCC(=O)N(c1c(C)cccc1C)C(C)C(=O)OC	-1.601	1
COCC(C)C	-0.9	1
COCC(C)OC(C)=O	0.176	1
COCCCNc1nc(NC(C)C)nc(SC)n1	-2.928	1
COCCN(C(=O)CCl)c1c(C)cccc1C	-2.086	1
COCCO	1.119	1
COCCOC	1.045	1
COCCOCCOC	0.872	1
COCCOc1c(OC)cc(Cc2cnc(N)nc2N)cc1OC	-2.101	1
COCOC	0.506	1
COCc1ccc([N+](=O)[O-])o1	-1.155	1
CON(C)C(=O)Nc1ccc(Br)c(Cl)c1	-3.924	1
CON(C)C(=O)Nc1ccc(Br)cc1	-2.895	1
CON(C)C(=O)Nc1ccc(Cl)c(Cl)c1	-3.521	1
CON(C)C(=O)Nc1ccc(Cl)cc1	-2.363	1
COP(=O)(NC(C)=O)SC	0.65	1
COP(=O)(OC)C(O)C(Cl)(Cl)Cl	-0.331	1
COP(=O)(OC)OC	0.553	1
COP(=O)(OC)OC(=CCl)c1cc(Cl)c(Cl)cc1Cl	-4.522	1
COP(=O)(OC)OC(Br)C(Cl)(Cl)Br	-2.28	1
COP(=O)(OC)OC(C)=CC(=O)N(C)C	0.625	1
COP(=O)(OC)OC(C)=CC(=O)OC(C)c1ccccc1	-2.497	1
COP(=O)(OC)OC1=C(Cl)C2C=CCC12	-2.001	1
COP(=O)(OC)OC=C(Cl)Cl	-1.344	1
COP(=O)(Oc1ccccc1)Oc1ccccc1	-2.121	1
COP(=S)(NC(C)C)Oc1ccc(Cl)cc1Cl	-4.798	1
COP(=S)(OC)Oc1c(Cl)cc(C)cc1Cl	-5.877	1
COP(=S)(OC)Oc1cc(Cl)c(Br)cc1Cl	-6.086	1
COP(=S)(OC)Oc1cc(Cl)c(Cl)cc1Cl	-5.507	1
COP(=S)(OC)Oc1ccc(C#N)cc1	-3.723	1
COP(=S)(OC)Oc1ccc(SC)c(C)c1	-4.569	1
COP(=S)(OC)Oc1ccc(Sc2ccc(OP(=S)(OC)OC)cc2)cc1	-6.237	1
COP(=S)(OC)Oc1ccc([N+](=O)[O-])c(C)c1	-3.863	1
COP(=S)(OC)Oc1ccc([N+](=O)[O-])c(Cl)c1	-3.872	1
COP(=S)(OC)Oc1ccc([N+](=O)[O-])cc1	-3.844	1
COP(=S)(OC)Oc1ccc([N+](=O)[O-])cc1Cl	-4.306	1
COP(=S)(OC)Oc1nc(Cl)c(Cl)cc1Cl	-4.831	1
COP(=S)(OC)SCC(=O)N(c1ccc(Cl)cc1)C(C)C	-4.432	1
COP(=S)(OC)SCCSC(C)C	-3.429	1
COP(=S)(OC)SCN1C(=O)c2ccccc2C1=O	-4.114	1
COP(=S)(OC)SCSc1ccc(Cl)cc1	-5.294	1
COP(=S)(OC)SCn1nnc2ccccc2c1=O	-4.181	1
COP(=S)(Oc1cc(Cl)c(Br)cc1Cl)c1ccccc1	-7.138	1
COP(C)(=O)OC	0.906	1
COP(N)(=O)SC	0.85	1
COP1(=S)OCc2ccccc2O1	-3.571	1
COS(=O)(=O)OC	-0.654	1
COc1c(Cl)cc(Cl)cc1Cl	-4.325	1
COc1c(Cl)ccc(Cl)c1C(=O)O	-1.691	1
COc1c(O)cc(Cl)c(Cl)c1Cl	-4.398	1
COc1c([N+](=O)[O-])cc([N+](=O)[O-])cc1[N+](=O)[O-]	-3.085	1
COc1c2c(cc3oc(=O)ccc13)OC(C)(C)C=C2	-3.81	1
COc1c2occc2cc2ccc(=O)oc12	-3.657	1
COc1cc(-c2ccc(N)c(OC)c2)ccc1N	-3.61	1
COc1cc(C(=O)O)ccc1O	-2.05	1
COc1cc(C2c3cc4c(c(O)c3CC3COC(=O)C32)OCO4)cc(OC)c1OC	-4.503	1
COc1cc(C2c3cc4c(cc3C(O)C3COC(=O)C23)OCO4)cc(OC)c1OC	-3.617	1
COc1cc(C=O)ccc1O	-1.141	1
COc1cc(Cc2cnc(N)nc2N)cc(OC)c1OC	-2.861	1
COc1cc(Cl)c(OC)cc1Cl	-4.413	1
COc1cc(N)c2c(c1N)C(=O)c1ccccc1C2=O	-5.746	1
COc1cc(NS(=O)(=O)c2ccc(N)cc2)nc(C)n1	-2.543	1
COc1cc(NS(=O)(=O)c2ccc(N)cc2)nc(OC)n1	-2.957	1
COc1cc(O)c(C(=O)c2ccccc2)cc1S(=O)(=O)O	-0.091	1
COc1cc(Oc2ccc(Cl)cc2Cl)ccc1[N+](=O)[O-]	-6.02	1
COc1cc2c(cc1OC)C13CCN4CC5=CCOC6CC(=O)N2C1C6C5CC43	-2.091	1
COc1ccc(C(=O)O)cc1	-2.458	1
COc1ccc(C(=O)c2cccc(C)c2)cc1C	-5.08	1
COc1ccc(C(=O)c2csc(S(N)(=O)=O)c2)cc1	-4.473	1
COc1ccc(C(O)(c2cncnc2)C2CC2)cc1	-2.596	1
COc1ccc(C(c2ccc(OC)cc2)C(Cl)(Cl)Cl)cc1	-6.539	1
COc1ccc(C=CC(=O)O)cc1	-2.398	1
COc1ccc(C=O)cc1	-1.502	1
COc1ccc(CC2NCC(O)C2OC(C)=O)cc1	-1.608	1
COc1ccc(NC(=O)N(C)C)cc1Cl	-2.581	1
COc1ccc(NC(N)=O)cc1	-1.592	1
COc1ccc(NS(=O)(=O)c2ccc(N)cc2)nn1	-3.28	1
COc1ccc(O)c([N+](=O)[O-])c1	-2.839	1
COc1ccc(O)cc1	-0.492	1
COc1ccc(Oc2ccc(NC(=O)N(C)C)cc2)cc1	-4.156	1
COc1ccc([N+](=O)[O-])cc1	-2.414	1
COc1ccc([N+](=O)[O-])cc1[N+](=O)[O-]	-3.107	1
COc1ccc2c(c1)N(CC(C)CN(C)C)c1ccccc1S2	-4.215	1
COc1ccc2c(c1OC)C(=O)OC2	-1.89	1
COc1ccc2c(c1OC)C(=O)OC2C1c2c(cc3c(c2OC)OCO3)CCN1C	-3.139	1
COc1ccc2c3c1OC1C(O)C=CC4C(C2)N(C)CCC341	-1.522	1
COc1ccc2cc(C(C)C(=O)O)ccc2c1	-4.161	1
COc1ccc2ccc(=O)oc2c1CC=C(C)C	-4.309	1
COc1cccc(OC)c1O	-0.952	1
COc1cccc([N+](=O)[O-])c1	-2.486	1
COc1ccccc1	-2.017	1
COc1ccccc1C(=O)O	-1.483	1
COc1ccccc1O	-0.822	1
COc1ccccc1OCC(O)COC(N)=O	-0.985	1
COc1ccccc1[N+](=O)[O-]	-1.957	1
COc1ccn(C)c(=O)c1C#N	-1.784	1
COc1cnc(NS(=O)(=O)c2ccc(N)cc2)nc1	-2.584	1
COc1coc(CSP(=O)(OC)OC)cc1=O	0.528	1
COc1nc(NC(C)C)nc(NC(C)C)n1	-2.478	1
COc1nn(CSP(=S)(OC)OC)c(=O)s1	-3.209	1
CS(=O)(=O)F	-0.515	1
CSC	-0.994	1
CSC(C)=NOC(=O)N(C)SN(C)C(=O)ON=C(C)SC	-4.269	1
CSCCC(N)C(=O)O	-0.421	1
CSCOC(=O)c1ccccc1OC(C)=O	-2.64	1
CSc1ccccc1	-2.39	1
CSc1nc(NC(C)C)nc(NC(C)C)n1	-3.864	1
CSc1nc2ccccc2s1	-3.161	1
CSc1nnc(C(C)(C)C)c(=O)n1N	-2.245	1
C[N+](=O)[O-]	0.26	1
Cc1[nH]c(=O)n(C(C)(C)C)c(=O)c1Cl	-2.485	1
Cc1c(C(N)=O)cc([N+](=O)[O-])cc1[N+](=O)[O-]	-2.352	1
Cc1c(C)c(C)c(C)c(C)c1C	-5.839	1
Cc1c(C)c2c3ccccc3ccc2c2ccccc12	-7.011	1
Cc1c(N(C)C)c(=O)n(-c2ccccc2)n1C	-0.629	1
Cc1c([N+](=O)[O-])cc([N+](=O)[O-])cc1[N+](=O)[O-]	-3.242	1
Cc1c([N+](=O)[O-])cccc1[N+](=O)[O-]	-3	1
Cc1c2ccccc2c(C)c2c1ccc1ccccc12	-6.624	1
Cc1c2ccccc2c(C)c2ccccc12	-6.566	1
Cc1c2ccccc2cc2c1ccc1ccccc12	-7.343	1
Cc1c2ccccc2cc2ccccc12	-5.867	1
Cc1c[nH]c(=O)[nH]c1=O	-1.519	1
Cc1c[nH]c2ccccc12	-2.421	1
Cc1cc(=O)[nH]o1	-0.067	1
Cc1cc(=O)n(-c2ccccc2)n1C	-0.564	1
Cc1cc(C)c(C(=O)O)c(C)c1	-2.357	1
Cc1cc(C)c(C)c(C)c1C	-3.981	1
Cc1cc(C)c(C)cc1C	-4.586	1
Cc1cc(C)c(N)cc1C	-1.955	1
Cc1cc(C)c(O)c(C)c1	-2.055	1
Cc1cc(C)c2ccccc2c1	-4.291	1
Cc1cc(C)c2ccccc2n1	-1.944	1
Cc1cc(C)cc(C)c1	-3.397	1
Cc1cc(C)cc(O)c1	-1.399	1
Cc1cc(C)nc(C)c1	-0.539	1
Cc1cc(C)nc(NS(=O)(=O)c2ccc(N)cc2)n1	-2.268	1
Cc1cc(Cl)ccc1O	-1.552	1
Cc1cc(Cl)ccc1OC(C)C(=O)O	-2.539	1
Cc1cc(Cl)ccc1OCC(=O)O	-2.503	1
Cc1cc(Cl)ccc1OCCCC(=O)O	-3.678	1
Cc1cc(N(C)C)nc(Cl)n1	-1.261	1
Cc1cc(N(CCO)CCO)ccc1N=Nc1ccc([N+](=O)[O-])cc1Cl	-6.57	1
Cc1cc(N)nc(C)n1	-1.284	1
Cc1cc(NS(=O)(=O)c2ccc(N)cc2)nc(C)n1	-2.238	1
Cc1cc(NS(=O)(=O)c2ccc(N)cc2)no1	-2.618	1
Cc1cc(O)c(Cl)c(C)c1Cl	-2.98	1
Cc1cc(O)c([N+](=O)[O-])cc1Cl	-4.39	1
Cc1cc(O)cc(C)c1Cl	-2.797	1
Cc1cc(O)ccc1[N+](=O)[O-]	-2.11	1
Cc1cc([N+](=O)[O-])cc([N+](=O)[O-])c1O	-3	1
Cc1cc2c3ccccc3ccc2c2ccccc12	-6.571	1
Cc1cc2ccccc2c2ccc3ccccc3c12	-6.592	1
Cc1cc2ccccc2cc1C	-4.895	1
Cc1ccc(-c2ccccc2)cc1	-4.618	1
Cc1ccc(Br)cc1	-3.192	1
Cc1ccc(C(=O)O)cc1	-2.603	1
Cc1ccc(C(=O)O)cc1C	-3.066	1
Cc1ccc(C(C)C)c(O)c1	-2.222	1
Cc1ccc(C(C)C)c(O)c1C(=O)O	-3.288	1
Cc1ccc(C(C)C)cc1	-3.759	1
Cc1ccc(C(C)C)cc1O	-2.08	1
Cc1ccc(C)c(C)c1	-3.324	1
Cc1ccc(C)c(O)c1	-1.538	1
Cc1ccc(C)c(O)c1C	-1.936	1
Cc1ccc(C)c2c(C)cccc12	-4.909	1
Cc1ccc(C)c2ccccc12	-4.137	1
Cc1ccc(C)cc1	-2.816	1
Cc1ccc(C)nc1	0.401	1
Cc1ccc(C=O)cc1	-1.724	1
Cc1ccc(CO)cc1	-1.2	1
Cc1ccc(Cl)c(Cl)c1	-3.792	1
Cc1ccc(Cl)cc1	-3.077	1
Cc1ccc(N(C)C)cc1	-2.318	1
Cc1ccc(N(CCO)CCO)cc1	-0.91	1
Cc1ccc(N)cc1	-1.217	1
Cc1ccc(NC(=O)N(C)C)cc1Cl	-3.483	1
Cc1ccc(O)c(C)c1	-1.191	1
Cc1ccc(O)c([N+](=O)[O-])c1	-2.384	1
Cc1ccc(O)cc1	-0.702	1
Cc1ccc(O)cc1C	-1.409	1
Cc1ccc(S(=O)(=O)NC(=O)NC2CCCCC2)cc1	-4.207	1
Cc1ccc(S(=O)(=O)NC(=O)NN2CCCCCC2)cc1	-3.678	1
Cc1ccc(S(N)(=O)=O)cc1	-1.734	1
Cc1ccc([N+](=O)[O-])c([N+](=O)[O-])c1	-3.26	1
Cc1ccc([N+](=O)[O-])cc1	-2.492	1
Cc1ccc([N+](=O)[O-])cc1[N+](=O)[O-]	-2.829	1
Cc1ccc2c(ccc3ccccc32)c1	-5.837	1
Cc1ccc2cc(C)c(C)cc2c1	-5.001	1
Cc1ccc2cc(C)ccc2c1	-4.893	1
Cc1ccc2cc3c(ccc4ccccc43)c3c2c1CC3	-7.966	1
Cc1ccc2cc3c(ccc4ccccc43)cc2c1	-6.816	1
Cc1ccc2cc3ccccc3cc2c1	-6.956	1
Cc1ccc2ccc(C)nc2c1	-1.944	1
Cc1ccc2ccccc2c1	-3.762	1
Cc1cccc(Br)c1	-3.523	1
Cc1cccc(C(=O)O)c1	-2.143	1
Cc1cccc(C)c1	-2.819	1
Cc1cccc(C)c1C	-3.204	1
Cc1cccc(C)c1N(Cn1cccn1)C(=O)CCl	-4.213	1
Cc1cccc(C)c1NC(=O)c1cc(S(N)(=O)=O)c(Cl)cc1O	-3.787	1
Cc1cccc(C)c1O	-1.305	1
Cc1cccc(C)n1	0.447	1
Cc1cccc(N)c1	-0.854	1
Cc1cccc(NC(=O)c2ccccc2C(=O)O)c1	-2.407	1
Cc1cccc(O)c1	-0.678	1
Cc1cccc(O)c1C	-1.427	1
Cc1cccc(O)c1[N+](=O)[O-]	-1.641	1
Cc1cccc(Oc2ccc([N+](=O)[O-])cc2)c1	-4.661	1
Cc1cccc(S(N)(=O)=O)c1	-1.341	1
Cc1cccc([N+](=O)[O-])c1	-2.438	1
Cc1cccc2c(C)cccc12	-4.756	1
Cc1cccc2c1Cc1ccccc1-2	-5.218	1
Cc1cccc2c1ccc1ccccc12	-5.854	1
Cc1cccc2ccc3cc4ccccc4cc3c12	-6.644	1
Cc1cccc2ccccc12	-3.741	1
Cc1cccc2sc3nncn3c12	-2.073	1
Cc1ccccc1	-2.243	1
Cc1ccccc1C	-2.776	1
Cc1ccccc1C(=O)O	-2.062	1
Cc1ccccc1COC1CC2(C(C)C)CCC1(C)O2	-3.639	1
Cc1ccccc1Cl	-2.53	1
Cc1ccccc1N	-0.81	1
Cc1ccccc1N1C(=O)c2cc(S(N)(=O)=O)c(Cl)cc2NC1C	-3.783	1
Cc1ccccc1O	-0.621	1
Cc1ccccc1OCC(O)CO	-1.189	1
Cc1ccccc1Oc1cccnn1	-1.969	1
Cc1ccccc1S(N)(=O)=O	-2.024	1
Cc1ccccc1[N+](=O)[O-]	-2.324	1
Cc1ccccn1	1.031	1
Cc1cccnc1	1.031	1
Cc1cccnc1C	0.385	1
Cc1ccco1	-1.437	1
Cc1ccnc(C)c1	0.514	1
Cc1ccncc1	1.031	1
Cc1ccncc1C	0.359	1
Cc1ccsc1	-2.39	1
Cc1cnc(=O)[nH]c1N	-0.56	1
Cc1cnc(NS(=O)(=O)c2ccc(N)cc2)nc1	-2.82	1
Cc1cnc2c(ccc3c(C)c(C)cnc32)c1C	-5.195	1
Cc1cnccn1	1.026	1
Cc1csc(NS(=O)(=O)c2ccc(N)cc2)n1	-2.129	1
Cc1nc(N(C)C)nc(OC(=O)N(C)C)c1C	-1.946	1
Cc1nc(NS(=O)(=O)c2ccc(N)cc2)oc1C	-2.202	1
Cc1nc2ccccc2[nH]1	-1.96	1
Cc1nnc(NS(=O)(=O)c2ccc(N)cc2)s1	-2.411	1
Cc1occc(=O)c1O	-1.063	1
Cc1occc1C(=O)Nc1ccccc1	-3.304	1
ClC(Br)Br	-1.919	1
ClC(Cl)(Cl)C(Cl)(Cl)Cl	-4.488	1
ClC(Cl)(Cl)Cl	-2.288	1
ClC(Cl)(Cl)c1ccccc1	-3.567	1
ClC(Cl)=C(Cl)C(Cl)=C(Cl)Cl	-4.911	1
ClC(Cl)=C(Cl)Cl	-2.919	1
ClC(Cl)=C(c1ccc(Cl)cc1)c1ccc(Cl)cc1	-6.9	1
ClC(Cl)Br	-1.733	1
ClC(Cl)C(Cl)(Cl)Cl	-2.625	1
ClC(Cl)C(Cl)Cl	-1.754	1
ClC(Cl)Cl	-1.177	1
ClC(Cl)c1ccccc1	-2.809	1
ClC1=C(Cl)C(Cl)(Cl)C(Cl)=C1Cl	-5.181	1
ClC1=C(Cl)C2(Cl)C3C(Cl)C(Cl)CC3C1(Cl)C2(Cl)Cl	-6.864	1
ClC1=C(Cl)C2(Cl)C3C(Cl)C=CC3C1(Cl)C2(Cl)Cl	-6.317	1
ClC1=C(Cl)C2(Cl)C3C4C=CC(C4)C3C1(Cl)C2(Cl)Cl	-7.332	1
ClC1=C(Cl)C2(Cl)C3C4CC(C5OC45)C3C1(Cl)C2(Cl)Cl	-6.237	1
ClC1=C(Cl)C2(Cl)C3C4OC4C(Cl)C3C1(Cl)C2(Cl)Cl	-6.289	1
ClC1C(Cl)C(Cl)C(Cl)C(Cl)C1Cl	-5.0775	1
ClC=C(Cl)Cl	-2.077	1
ClC=CCCl	-2.045	1
ClC=CCl	-1.442	1
ClCBr	-0.889	1
ClCC(Br)CBr	-2.374	1
ClCC(Cl)Cl	-1.48	1
ClCC1CO1	-0.147	1
ClCCBr	-1.318	1
ClCCCBr	-1.847	1
ClCCCCl	-1.614	1
ClCCCl	-1.065	1
ClCCOCCCl	-0.92	1
ClCCOCCOCCCl	-0.996	1
ClCCSCCCl	-2.363	1
ClCCl	-0.815	1
ClCc1ccccc1	-2.382	1
Clc1c(Cl)c(Cl)c(-c2c(Cl)c(Cl)c(Cl)c(Cl)c2Cl)c(Cl)c1Cl	-10.827	1
Clc1c(Cl)c(Cl)c(Cl)c(Cl)c1Cl	-7.662	1
Clc1c(Cl)c(Cl)c2c(Cl)c(Cl)c(Cl)c(Cl)c2c1Cl	-9.703	1
Clc1c(Cl)c(Cl)c2c(c1Cl)Oc1c(Cl)c(Cl)c(Cl)c(Cl)c1O2	-12.06	1
Clc1c(Cl)c(Cl)c2c(c1Cl)Oc1ccccc1O2	-8.708	1
Clc1c(Cl)c(Cl)c2ccccc2c1Cl	-7.795	1
Clc1c(Cl)c(Cl)c2nccnc2c1Cl	-5.428	1
Clc1cc(-c2cc(Cl)c(Cl)c(Cl)c2)cc(Cl)c1Cl	-8.85	1
Clc1cc(-c2ccccc2)c(Cl)c(Cl)c1Cl	-7.319	1
Clc1cc(Cl)c(-c2c(Cl)cc(Cl)cc2Cl)c(Cl)c1	-8.947	1
Clc1cc(Cl)c(-c2c(Cl)ccc(Cl)c2Cl)cc1Cl	-7.93	1
Clc1cc(Cl)c(-c2cc(Cl)c(Cl)cc2Cl)cc1Cl	-8.58	1
Clc1cc(Cl)c(-c2ccc(Cl)c(Cl)c2Cl)cc1Cl	-8.381	1
Clc1cc(Cl)c(-c2cccc(Cl)c2Cl)cc1Cl	-7.06	1
Clc1cc(Cl)c(-c2ccccc2)c(Cl)c1	-6.009	1
Clc1cc(Cl)c(-c2ccccc2)cc1Cl	-6.199	1
Clc1cc(Cl)c(Cl)c(-c2c(Cl)c(Cl)cc(Cl)c2Cl)c1Cl	-9.466	1
Clc1cc(Cl)c(Cl)c(-c2c(Cl)ccc(Cl)c2Cl)c1	-7.822	1
Clc1cc(Cl)c(Cl)c(Cl)c1	-4.627	1
Clc1cc(Cl)c(Cl)c(Cl)c1Cl	-5.479	1
Clc1cc(Cl)c(Cl)cc1Cl	-5.56	1
Clc1cc(Cl)c2c(c1Cl)Oc1ccccc1O2	-7.534	1
Clc1cc(Cl)c2cc(Cl)cc(Cl)c2c1	-7.823	1
Clc1cc(Cl)c2cc(Cl)ccc2c1	-6.556	1
Clc1cc(Cl)cc(-c2c(Cl)c(Cl)cc(Cl)c2Cl)c1	-8.27	1
Clc1cc(Cl)cc(Cl)c1	-4.48	1
Clc1cc2c(Cl)ccc(Cl)c2cc1Cl	-7.516	1
Clc1cc2c(Cl)cccc2c(Cl)c1Cl	-7.857	1
Clc1cc2c(c(Cl)c1Cl)Oc1c(Cl)c(Cl)c(Cl)c(Cl)c1O2	-11.248	1
Clc1cc2c(cc1Cl)Oc1c(Cl)c(Cl)c(Cl)c(Cl)c1O2	-10.949	1
Clc1cc2c(cc1Cl)Oc1cc(Cl)c(Cl)cc1O2	-9.207	1
Clc1cc2ccccc2cc1Cl	-6.357	1
Clc1cc2oc3cc(Cl)c(Cl)cc3c2cc1Cl	-8.646	1
Clc1ccc(-c2c(Cl)ccc(Cl)c2Cl)cc1Cl	-7.65	1
Clc1ccc(-c2c(Cl)cccc2Cl)cc1	-6.209	1
Clc1ccc(-c2cc(Cl)c(Cl)c(Cl)c2Cl)c(Cl)c1	-8.52	1
Clc1ccc(-c2cc(Cl)c(Cl)cc2Cl)c(Cl)c1	-7.95	1
Clc1ccc(-c2cc(Cl)c(Cl)cc2Cl)cc1	-7.77	1
Clc1ccc(-c2cc(Cl)c(Cl)cc2Cl)cc1Cl	-7.387	1
Clc1ccc(-c2cc(Cl)ccc2Cl)c(Cl)c1	-6.573	1
Clc1ccc(-c2cc(Cl)ccc2Cl)cc1	-6.256	1
Clc1ccc(-c2ccc(Cl)c(Cl)c2)c(Cl)c1	-6.9	1
Clc1ccc(-c2ccc(Cl)c(Cl)c2)cc1Cl	-8.71	1
Clc1ccc(-c2ccc(Cl)c(Cl)c2Cl)c(Cl)c1	-7.62	1
Clc1ccc(-c2ccc(Cl)c(Cl)c2Cl)c(Cl)c1Cl	-9.013	1
Clc1ccc(-c2ccc(Cl)c(Cl)c2Cl)cc1	-6.875	1
Clc1ccc(-c2ccc(Cl)cc2)cc1	-6.556	1
Clc1ccc(-c2ccc(Cl)cc2Cl)c(Cl)c1	-6.732	1
Clc1ccc(-c2ccc(Cl)cc2Cl)cc1	-5.979	1
Clc1ccc(-c2cccc(Cl)c2Cl)cc1	-6.259	1
Clc1ccc(-c2ccccc2)c(Cl)c1	-5.288	1
Clc1ccc(-c2ccccc2)cc1	-5.149	1
Clc1ccc(-c2ccccc2)cc1Cl	-6.39	1
Clc1ccc(-c2ccccc2Cl)c(Cl)c1	-6.49	1
Clc1ccc(-c2ccccc2Cl)cc1	-5.28	1
Clc1ccc(-c2ccccc2Cl)cc1Cl	-6.287	1
Clc1ccc(Br)cc1	-3.63	1
Clc1ccc(C(c2ccc(Cl)cc2)C(Cl)(Cl)Cl)cc1	-7.809	1
Clc1ccc(C(c2ccc(Cl)cc2)C(Cl)Cl)cc1	-6.551	1
Clc1ccc(C(c2ccccc2Cl)C(Cl)(Cl)Cl)cc1	-6.62	1
Clc1ccc(C(c2ccccc2Cl)C(Cl)Cl)cc1	-6.505	1
Clc1ccc(Cl)c(-c2c(Cl)ccc(Cl)c2Cl)c1	-7.19	1
Clc1ccc(Cl)c(-c2c(Cl)ccc(Cl)c2Cl)c1Cl	-7.903	1
Clc1ccc(Cl)c(-c2cc(Cl)c(Cl)cc2Cl)c1	-7.326	1
Clc1ccc(Cl)c(-c2cc(Cl)ccc2Cl)c1	-7.281	1
Clc1ccc(Cl)c(-c2ccc(Cl)c(Cl)c2)c1	-6.853	1
Clc1ccc(Cl)c(-c2ccc(Cl)c(Cl)c2Cl)c1	-7.045	1
Clc1ccc(Cl)c(-c2cccc(Cl)c2Cl)c1	-6.465	1
Clc1ccc(Cl)c(-c2ccccc2)c1	-5.299	1
Clc1ccc(Cl)c(-c2ccccc2)c1Cl	-6.49	1
Clc1ccc(Cl)c(-c2ccccc2Cl)c1	-5.809	1
Clc1ccc(Cl)c(Cl)c1	-3.569	1
Clc1ccc(Cl)c(Cl)c1Cl	-4.562	1
Clc1ccc(Cl)c2ccccc12	-5.803	1
Clc1ccc(Cl)cc1	-3.257	1
Clc1ccc(Oc2ccccc2)cc1	-4.793	1
Clc1ccc2c(c1)Oc1c(Cl)c(Cl)c(Cl)c(Cl)c1O2	-9.473	1
Clc1ccc2c(c1)Oc1cc(Cl)c(Cl)c(Cl)c1O2	-8.874	1
Clc1ccc2c(c1)Oc1ccccc1O2	-5.836	1
Clc1ccc2ccc(Cl)cc2c1	-5.922	1
Clc1ccc2ccccc2c1	-4.143	1
Clc1cccc(-c2c(Cl)ccc(Cl)c2Cl)c1Cl	-6.78	1
Clc1cccc(-c2cc(Cl)c(Cl)c(Cl)c2Cl)c1Cl	-8.421	1
Clc1cccc(-c2cc(Cl)ccc2Cl)c1	-6.008	1
Clc1cccc(-c2cccc(Cl)c2)c1	-5.798	1
Clc1cccc(-c2cccc(Cl)c2Cl)c1Cl	-7.272	1
Clc1cccc(-c2ccccc2)c1	-4.716	1
Clc1cccc(-c2ccccc2)c1Cl	-5.35	1
Clc1cccc(-c2ccccc2Cl)c1	-5.585	1
Clc1cccc(Br)c1	-3.21	1
Clc1cccc(C(Cl)(Cl)Cl)n1	-3.761	1
Clc1cccc(Cl)c1	-3.07	1
Clc1cccc(Cl)c1-c1c(Cl)cccc1Cl	-7.39	1
Clc1cccc(Cl)c1-c1ccccc1	-4.966	1
Clc1cccc(Cl)c1Cl	-4.003	1
Clc1cccc2c(Cl)cccc12	-5.716	1
Clc1cccc2cccc(Cl)c12	-5.796	1
Clc1cccc2ccccc12	-3.971	1
Clc1ccccc1	-2.354	1
Clc1ccccc1-c1c(Cl)cccc1Cl	-5.9	1
Clc1ccccc1-c1ccc(Cl)c(Cl)c1Cl	-6.83	1
Clc1ccccc1-c1cccc(Cl)c1Cl	-5.944	1
Clc1ccccc1-c1ccccc1	-4.592	1
Clc1ccccc1-c1ccccc1Cl	-5.081	1
Clc1ccccc1Br	-3.203	1
Clc1ccccc1Cl	-2.974	1
Clc1ccccn1	-0.754	1
Clc1nc(Cl)nc(Nc2ccccc2Cl)n1	-4.537	1
Cn1c(=O)c2[nH]cnc2n(C)c1=O	-1.389	1
Cn1c(=O)c2c(ncn2C)n(C)c1=O	-0.966	1
Cn1cc(-c2ccccc2)c(=O)c(-c2cccc(C(F)(F)F)c2)c1	-4.438	1
Cn1ccc(=O)[nH]c1=O	-0.8	1
Cn1ccccc1=O	0.962	1
Cn1cnc2c1c(=O)[nH]c(=O)n2C	-2.737	1
FC(Br)C(F)(F)F	-1.901	1
FC(Cl)(Cl)C(F)(Cl)Cl	-3.189	1
FC(Cl)(Cl)Cl	-2.096	1
FC(Cl)Cl	-0.738	1
FC(F)(Cl)C(F)(Cl)Cl	-3.042	1
FC(F)(Cl)C(F)(F)Cl	-3.119	1
FC(F)(Cl)Cl	-2.635	1
FC(F)(F)Br	-2.668	1
FC(F)(F)C(Cl)Br	-1.704	1
FC(F)(F)C(F)(F)C(F)(F)F	-4.518	1
FC(F)(F)C(F)(F)Cl	-3.411	1
FC(F)(F)Cl	-3.065	1
FC(F)(F)c1ccccc1	-2.511	1
FC(F)Cl	-1.494	1
FC(F)F	-1.233	1
FC(F)OC(Cl)C(F)(F)F	-1.616	1
FC(F)OC(F)(F)C(F)Cl	-1.516	1
FC1(F)C(F)(F)C(F)(F)C1(F)F	-3.638	1
Fc1cc(F)c(F)c(F)c1	-2.306	1
Fc1cc(F)c(F)cc1F	-2.376	1
Fc1ccc(CCl)cc1	-2.544	1
Fc1ccc(F)cc1	-1.971	1
Fc1cccc(Br)c1	-2.666	1
Fc1cccc(CCl)c1	-2.544	1
Fc1cccc(F)c1	-2	1
Fc1ccccc1	-1.795	1
Fc1ccccc1Br	-2.695	1
Fc1ccccc1CCl	-2.541	1
Fc1ccccc1Cl	-2.416	1
Fc1ccccc1F	-2	1
N#CCC#N	0.304	1
N#CCC(N)=O	0.189	1
N#CCCC#N	0.204	1
N#CCCCC#N	1.026	1
N#CCCCCC#N	-0.131	1
N#CCCN(CCO)c1ccc(N=Nc2ccc([N+](=O)[O-])cc2Cl)cc1	-6.13	1
N#CNC(=N)N	-0.309	1
N#Cc1c(Cl)c(Cl)c(Cl)c(C#N)c1Cl	-5.647	1
N#Cc1c(Cl)cccc1Cl	-3.98	1
N#Cc1cc(Br)c(O)c(Br)c1	-3.328	1
N#Cc1ccccc1	-1.712	1
N=C(N)NCCCC(N)C(=O)O	0.019	1
NC(=O)CCC(N)C(=O)O	-0.549	1
NC(=O)CCl	-0.017	1
NC(=O)CF	1.113	1
NC(=O)COC(=O)c1ccccc1	-1.641	1
NC(=O)NCc1ccccc1	-0.946	1
NC(=O)NO	1.119	1
NC(=O)OCC(Cl)(Cl)Cl	-1.284	1
NC(=O)c1c(Cl)cccc1Cl	-1.843	1
NC(=O)c1ccccc1	-0.953	1
NC(=O)c1ccccc1O	-1.823	1
NC(=O)c1cccnc1	0.612	1
NC(=O)c1cnccn1	-0.914	1
NC(=S)Nc1cccc2ccccc12	-2.528	1
NC(=S)Nc1ccccc1	-1.79	1
NC(=S)c1c(Cl)cccc1Cl	-2.336	1
NC(CC(=O)O)C(=O)O	-0.318	1
NC(CCC(=O)O)C(=O)O	-1.235	1
NC(Cc1c[nH]c2ccccc12)C(=O)O	-1.183	1
NC(Cc1ccc(O)c(O)c1)C(=O)O	-1.596	1
NC(Cc1ccc(O)cc1)C(=O)O	-2.578	1
NC(Cc1cnc[nH]1)C(=O)O	-0.532	1
NC(N)=O	0.958	1
NC(N)=S	0.271	1
NC1(C(=O)O)CCCC1	-0.412	1
NC1CCCCC1	1.004	1
NC=O	1.346	1
NCC(=O)NCC(=O)NCC(=O)O	-0.51	1
NCC(=O)O	0.521	1
NCC1CCC(C(=O)O)CC1	0.026	1
NCCC(=O)O	0.787	1
NCCCC(=O)O	1.101	1
NCCCCCC(=O)O	0.585	1
NCCCCCCN	0.935	1
NCCNCCNCCN	0.835	1
NCCNCCNCCNCCN	0.723	1
NCCNc1cccc2ccccc12	-1.969	1
NCCO	1.214	1
NCCS(=O)(=O)O	-0.191	1
NCCc1ccc(O)cc1	-1.12	1
NCc1ccccc1	0.97	1
NCc1ccco1	1.013	1
NNC(=O)c1ccncc1	0.009	1
NNc1ccccc1	0.07	1
NS(=O)(=O)c1cc(C(=O)O)c(NCc2ccco2)cc1Cl	-3.656	1
NS(=O)(=O)c1cc(C2(O)NC(=O)c3ccccc32)ccc1Cl	-3.451	1
NS(=O)(=O)c1cc2c(cc1C(F)(F)F)NC(Cc1ccccc1)NS2(=O)=O	-3.591	1
NS(=O)(=O)c1cc2c(cc1C(F)(F)F)NCNS2(=O)=O	-3.043	1
NS(=O)(=O)c1cc2c(cc1Cl)N=CNS2(=O)=O	-3.046	1
NS(=O)(=O)c1cc2c(cc1Cl)NC(C(Cl)Cl)NS2(=O)=O	-2.677	1
NS(=O)(=O)c1cc2c(cc1Cl)NCNS2(=O)=O	-2.615	1
NS(=O)(=O)c1cc2c(s1)S(=O)(=O)CCC2=O	-3.018	1
NS(=O)(=O)c1cc2c(s1)SCCC2=O	-3.552	1
NS(=O)(=O)c1ccc(S(=O)(=O)CCCO)c(F)c1	-1.654	1
NS(=O)(=O)c1ccc(S(=O)(=O)CCCO)cc1	-1.589	1
NS(=O)(=O)c1ccc(S(=O)(=O)CCO)c(F)c1	-1.934	1
NS(=O)(=O)c1ccc(S(=O)(=O)CCO)cc1	-1.604	1
NS(=O)(=O)c1ccc(SCCCCCO)cc1	-2.662	1
NS(=O)(=O)c1ccc(SCCCCO)c(F)c1	-2.446	1
NS(=O)(=O)c1ccc(SCCCO)c(F)c1	-2.47	1
NS(=O)(=O)c1ccc(SCCCO)c([N+](=O)[O-])c1	-3.466	1
NS(=O)(=O)c1ccc(SCCCO)cc1	-2.247	1
NS(=O)(=O)c1ccc(SCCO)c(F)c1	-1.622	1
NS(=O)(=O)c1ccc(SCCO)c([N+](=O)[O-])c1	-2.746	1
NS(=O)(=O)c1ccc(SCCO)cc1	-1.824	1
NS(=O)(=O)c1ccccc1	-1.563	1
Nc1c(Cl)c(Cl)nc(C(=O)O)c1Cl	-2.749	1
Nc1c(Cl)cc(Cl)cc1Cl	-3.691	1
Nc1c(Cl)cc([N+](=O)[O-])cc1Cl	-4.471	1
Nc1cc(Cl)cc(C(=O)O)c1Cl	-2.469	1
Nc1cc(Cl)cc(Cl)c1	-2.315	1
Nc1cc(N2CCCCC2)nc(N)[n+]1[O-]	-1.982	1
Nc1cc([N+](=O)[O-])cc([N+](=O)[O-])c1O	-2.153	1
Nc1cc([N+](=O)[O-])ccc1Br	-3.558	1
Nc1cc2c3ccccc3ccc2c2ccccc12	-6.196	1
Nc1ccc(-c2ccc(Cl)cc2)cc1	-4.639	1
Nc1ccc(-c2ccc(N)c(Cl)c2)cc1Cl	-4.912	1
Nc1ccc(-c2ccc(N)cc2)cc1	-2.758	1
Nc1ccc(C(=O)O)c(O)c1	-1.957	1
Nc1ccc(C(=O)O)cc1	-1.351	1
Nc1ccc(C(=O)Oc2ccccc2)c(O)c1	-4.515	1
Nc1ccc(Cc2ccc(N)cc2)cc1	-2.297	1
Nc1ccc(Cl)c(Cl)c1	-3.246	1
Nc1ccc(Cl)cc1	-1.515	1
Nc1ccc(Cl)cc1Cl	-2.417	1
Nc1ccc(N)c2c1C(=O)c1ccccc1C2=O	-5.859	1
Nc1ccc(N)cc1	-0.466	1
Nc1ccc(N=Nc2ccccc2)cc1	-3.181	1
Nc1ccc(O)cc1	-0.834	1
Nc1ccc(S(=O)(=O)Nc2ccnn2-c2ccccc2)cc1	-2.321	1
Nc1ccc(S(=O)(=O)Nc2cnc3ccccc3n2)cc1	-4.603	1
Nc1ccc(S(=O)(=O)Nc2nccs2)cc1	-2.425	1
Nc1ccc(S(=O)(=O)c2ccc(N)cc2)cc1	-2.815	1
Nc1ccc(S(=O)(=O)c2ccc(NCCO)cc2)cc1	-2.597	1
Nc1ccc(S(=O)(=O)c2cnc(N)s2)cc1	-2.805	1
Nc1ccc(S(N)(=O)=O)cc1	-1.361	1
Nc1ccc([N+](=O)[O-])cc1	-2.278	1
Nc1ccc2cc3ccccc3cc2c1	-5.172	1
Nc1ccc2ccccc2c1N=Nc1ccccc1	-5.916	1
Nc1cccc(C(=O)O)c1	-1.366	1
Nc1cccc(Cl)c1	-1.373	1
Nc1cccc(N)c1	0.343	1
Nc1cccc(O)c1	-0.607	1
Nc1cccc([N+](=O)[O-])c1	-2.061	1
Nc1cccc2c(N)cccc12	-2.619	1
Nc1cccc2cccc(N)c12	-2.27	1
Nc1cccc2ccccc12	-1.925	1
Nc1ccccc1	-0.413	1
Nc1ccccc1C(=O)O	-1.593	1
Nc1ccccc1Cl	-1.194	1
Nc1ccccc1N	-0.428	1
Nc1ccccc1O	-0.737	1
Nc1ccccc1[N+](=O)[O-]	-1.973	1
Nc1cnn(-c2ccccc2)c(=O)c1Cl	-2.744	1
Nc1nc(=O)[nH]cc1F	-0.935	1
Nc1nc(N)nc(-c2ccccc2)n1	-2.494	1
Nc1nc(N)nc(NC2CC2)n1	-1.179	1
Nc1ncnc2c1ncn2C1(CO)OC(CO)C(O)C1O	-1.57	1
O=C(C(Cl)Cl)N(CCO)Cc1ccc(Oc2ccc([N+](=O)[O-])cc2)cc1	-5.124	1
O=C(C1CCCCC1)N1CC(=O)N2CCc3ccccc3C2C1	-2.893	1
O=C(C=CC=Cc1ccc2c(c1)OCO2)N1CCCCC1	-3.853	1
O=C(CCCN1CCC(O)(c2ccc(Cl)cc2)CC1)c1ccc(F)cc1	-4.429	1
O=C(CCCl)NCc1ccccc1	-3.296	1
O=C(CCc1ccc(O)cc1)c1c(O)cc(O)cc1OC1OC(CO)C(O)C(O)C1O	-2.64	1
O=C(CO)C(O)C(O)C(O)CO	0.301	1
O=C(Cn1ccnc1[N+](=O)[O-])NCc1ccccc1	-2.813	1
O=C(NC(=O)c1c(F)cccc1F)Nc1cc(Cl)c(F)c(Cl)c1F	-7.28	1
O=C(NC(=O)c1c(F)cccc1F)Nc1ccc(Cl)cc1	-6.015	1
O=C(NC(=O)c1ccccc1)c1ccccc1	-2.273	1
O=C(NC(CO)C(O)c1ccc([N+](=O)[O-])cc1)C(Cl)Cl	-2.111	1
O=C(NCN1CCOCC1)c1cnccn1	0.176	1
O=C(NN=Cc1ccccc1O)c1ccncc1	-3.683	1
O=C(Nc1ccc([N+](=O)[O-])cc1Cl)c1cc(Cl)ccc1O	-4.702	1
O=C(Nc1cccc(Cl)c1)OCC#CCCl	-4.37	1
O=C(Nc1ccccc1)c1ccccc1O	-3.589	1
O=C(O)C(Cl)(Cl)Cl	0.519	1
O=C(O)C(Cl)Cl	0.89	1
O=C(O)C(O)(c1ccccc1)c1ccccc1	-2.209	1
O=C(O)C(O)C(O)C(O)C(O)CO	0.207	1
O=C(O)C(O)c1ccccc1	0.075	1
O=C(O)C(c1ccccc1)c1ccccc1	-3.223	1
O=C(O)C1(O)c2ccccc2-c2ccc(Cl)cc21	-4.161	1
O=C(O)C1=CC(O)C(O)C(O)C1	-0.065	1
O=C(O)C1CCCCC1	-1.445	1
O=C(O)C1CCCN1	0.148	1
O=C(O)C=C(CC(=O)O)C(=O)O	0.458	1
O=C(O)C=CC=CC(=O)O	-2.852	1
O=C(O)C=Cc1c[nH]cn1	-1.964	1
O=C(O)C=Cc1ccccc1	-2.4245	1
O=C(O)C=Cc1ccco1	-1.839	1
O=C(O)CC(=O)O	0.865	1
O=C(O)CC(CC(=O)O)C(=O)O	0.275	1
O=C(O)CC(Cl)C(=O)O	0.077	1
O=C(O)CC(O)(CC(=O)O)C(=O)O	0.489	1
O=C(O)CC(O)C(=O)O	0.873	1
O=C(O)CCC(=O)O	-0.152	1
O=C(O)CCC(=O)OOC(=O)CCC(=O)O	-0.847	1
O=C(O)CCC(=O)c1ccc(-c2ccccc2)cc1	-5.061	1
O=C(O)CCCC(=O)O	1.083	1
O=C(O)CCCCC(=O)O	-0.676	1
O=C(O)CCCCC1SCC2NC(=O)NC21	-3.046	1
O=C(O)CCCCCC(=O)O	-0.506	1
O=C(O)CCCCCCC(=O)O	-1.169	1
O=C(O)CCCCCCCC(=O)O	-1.894	1
O=C(O)CCCCCCCCC(=O)O	-2.306	1
O=C(O)CCCCCCCCCCBr	-3.699	1
O=C(O)CCCCCCCCCCC(=O)O	-3.76	1
O=C(O)CCCCCCCCCCCC(=O)O	-2.212	1
O=C(O)CCCOc1ccc(Cl)cc1Cl	-3.672	1
O=C(O)CCSCCC(=O)O	-0.68	1
O=C(O)CCc1ccccc1	-1.406	1
O=C(O)CCl	0.928	1
O=C(O)CNC(=O)c1ccccc1	-1.679	1
O=C(O)COc1c(Cl)cc(Cl)cc1Cl	-3.013	1
O=C(O)COc1c(Cl)ccc(Cl)c1Cl	-2.62	1
O=C(O)COc1cc(Cl)c(Cl)cc1Cl	-2.963	1
O=C(O)COc1ccc(Cl)c(Cl)c1	-2.685	1
O=C(O)COc1ccc(Cl)cc1	-2.29	1
O=C(O)COc1ccc(Cl)cc1Cl	-2.514	1
O=C(O)COc1cccc(Cl)c1Cl	-2.809	1
O=C(O)COc1ccccc1	-1.103	1
O=C(O)COc1ccccc1Cl	-2.164	1
O=C(O)COc1nc(Cl)c(Cl)cc1Cl	-2.766	1
O=C(O)CS	1.036	1
O=C(O)Cc1c(Cl)ccc(Cl)c1Cl	-3.078	1
O=C(O)Cc1c[nH]c2ccccc12	-2.067	1
O=C(O)Cc1cccc2ccccc12	-2.647	1
O=C(O)Cc1ccccc1	-0.914	1
O=C(O)c1c(Cl)ccc(Cl)c1Cl	-1.467	1
O=C(O)c1c(O)cccc1O	-1.207	1
O=C(O)c1c2ccccc2cc2ccccc12	-3.417	1
O=C(O)c1cc(-c2ccccc2)nc2ccccc12	-3.193	1
O=C(O)c1cc(C(=O)O)c(C(=O)O)cc1C(=O)O	-1.259	1
O=C(O)c1cc(Cl)cc(Cl)c1	-3.114	1
O=C(O)c1cc(Cl)ccc1[N+](=O)[O-]	-1.319	1
O=C(O)c1cc(O)c(O)c(O)c1	-1.155	1
O=C(O)c1cc(O)cc(C(=O)O)c1	-2.482	1
O=C(O)c1cc(O)ccc1O	-1.489	1
O=C(O)c1cc(O)nc(O)n1	-1.933	1
O=C(O)c1cc([N+](=O)[O-])cc([N+](=O)[O-])c1	-2.196	1
O=C(O)c1ccc(Br)cc1	-3.525	1
O=C(O)c1ccc(C(=O)O)c(C(=O)O)c1	-1	1
O=C(O)c1ccc(C(=O)O)nc1	-2.13	1
O=C(O)c1ccc(Cl)c(Cl)c1	-3.495	1
O=C(O)c1ccc(Cl)cc1	-3.337	1
O=C(O)c1ccc(Cl)cc1Cl	-2.603	1
O=C(O)c1ccc(F)cc1	-2.067	1
O=C(O)c1ccc(O)c(O)c1	-0.928	1
O=C(O)c1ccc(O)c(O)c1O	-2.231	1
O=C(O)c1ccc(O)cc1	-1.441	1
O=C(O)c1ccc([N+](=O)[O-])c([N+](=O)[O-])c1	-1.501	1
O=C(O)c1ccc([N+](=O)[O-])cc1	-2.922	1
O=C(O)c1ccc([N+](=O)[O-])cc1[N+](=O)[O-]	-1.067	1
O=C(O)c1ccc2ccccc2c1	-3.564	1
O=C(O)c1cccc(Br)c1	-2.699	1
O=C(O)c1cccc(C(=O)O)c1	-3.22	1
O=C(O)c1cccc(Cl)c1	-2.541	1
O=C(O)c1cccc(Cl)c1[N+](=O)[O-]	-2.632	1
O=C(O)c1cccc(F)c1	-1.97	1
O=C(O)c1cccc(O)c1	-1.28	1
O=C(O)c1cccc([N+](=O)[O-])c1	-1.669	1
O=C(O)c1cccc([N+](=O)[O-])c1C(=O)O	-1.021	1
O=C(O)c1cccc([N+](=O)[O-])c1O	-2.149	1
O=C(O)c1ccccc1	-1.655	1
O=C(O)c1ccccc1-c1ccccc1C(=O)O	-2.284	1
O=C(O)c1ccccc1C(=O)Nc1cccc2ccccc12	-3.163	1
O=C(O)c1ccccc1C(=O)O	-1.375	1
O=C(O)c1ccccc1C(c1ccc(O)cc1)c1ccc(O)cc1	-3.263	1
O=C(O)c1ccccc1Cl	-1.875	1
O=C(O)c1ccccc1F	-1.289	1
O=C(O)c1ccccc1Nc1cccc(C(F)(F)F)c1	-3.3	1
O=C(O)c1ccccc1O	-1.79	1
O=C(O)c1ccccc1S(=O)(=O)O	0.393	1
O=C(O)c1ccccc1[N+](=O)[O-]	-1.328	1
O=C(O)c1cccnc1	-0.835	1
O=C(O)c1cccnc1C(=O)O	-1.182	1
O=C(O)c1ccco1	-0.48	1
O=C(O)c1ccnc(C(=O)O)c1	-1.827	1
O=C(O)c1ccncc1	-1.374	1
O=C(O)c1ccncc1C(=O)O	-1.854	1
O=C(O)c1ccsc1	-1.474	1
O=C(O)c1cnc(O)nc1O	-1.938	1
O=C(O)c1nc(Cl)ccc1Cl	-2.283	1
O=C(O)c1nc[nH]c1C(=O)O	-2.494	1
O=C(OCCOCCO)c1ccccc1Nc1cccc(C(F)(F)F)c1	-5.363	1
O=C(OOC(=O)c1ccccc1)c1ccccc1	-4.425	1
O=C(Oc1ccccc1)c1ccccc1O	-3.155	1
O=C(c1ccc(O)c(O)c1)c1c(O)cc(O)cc1O	-1.72	1
O=C(c1ccccc1)C(O)c1ccccc1	-2.85	1
O=C(c1ccccc1)c1ccccc1	-3.124	1
O=C(c1ccccc1O)N1CCOCC1	-1.704	1
O=C1C(Cl)=C(Cl)C(=O)c2ccccc21	-4.382	1
O=C1C(Cl)=C(NC(=O)C(Cl)Cl)C(=O)c2ccccc21	-5.026	1
O=C1C2CC=CCC2C(=O)N1SC(Cl)(Cl)Cl	-4.77	1
O=C1C=CC(=O)C=C1	-0.989	1
O=C1CC2OCC=C3CN4CCC56c7ccccc7N1C5C2C3CC46	-3.32	1
O=C1CCC(=O)N1	0.296	1
O=C1CCC(C(=O)O)N1	0.567	1
O=C1CCCCC1	-0.594	1
O=C1CCCCCN1	0.834	1
O=C1CCCN1	1.07	1
O=C1CCCO1	1.065	1
O=C1CCO1	0.711	1
O=C1CNC(=O)N1	-0.402	1
O=C1NC(=O)C(c2ccccc2)(c2ccccc2)N1	-3.897	1
O=C1NC(=O)c2ccccc21	-2.611	1
O=C1NCCN1c1ncc([N+](=O)[O-])s1	-3.217	1
O=C1NS(=O)(=O)c2ccccc21	-1.661	1
O=C1Nc2ccc(Cl)cc2C(c2ccccc2Cl)=NC1O	-3.604	1
O=C1OC(=O)c2ccccc21	-1.378	1
O=C1OC(C(O)CO)C(O)=C1O	0.3165	1
O=C1OC(c2ccc(O)cc2)(c2ccc(O)cc2)c2ccccc21	-2.901	1
O=C1OCc2c(Cl)c(Cl)c(Cl)c(Cl)c21	-5.037	1
O=C1c2ccccc2C(=O)C1c1ccc2ccccc2n1	-6.209	1
O=C1c2ccccc2C(=O)c2c1ccc(O)c2O	-2.779	1
O=C1c2ccccc2C(=O)c2ccccc21	-5.188	1
O=CC(Cl)(Cl)Cl	-0.691	1
O=CC=Cc1ccccc1	-1.969	1
O=CNc1ccccc1	-0.678	1
O=CO	1.337	1
O=Cc1ccc(C=O)cc1	-2.827	1
O=Cc1ccc(O)c(O)c1	-0.441	1
O=Cc1ccc(O)c([N+](=O)[O-])c1	-2.949	1
O=Cc1ccc(O)cc1	-0.976	1
O=Cc1ccc([N+](=O)[O-])cc1	-1.81	1
O=Cc1ccc2c(c1)OCO2	-1.632	1
O=Cc1cccc(O)c1	-0.647	1
O=Cc1cccc([N+](=O)[O-])c1	-1.967	1
O=Cc1ccccc1	-1.208	1
O=Cc1ccccc1[N+](=O)[O-]	-1.814	1
O=Cc1ccco1	-0.096	1
O=NCc1ccc([N+](=O)[O-])o1	-2.193	1
O=NN(CCCl)C(=O)NCCCl	-1.728	1
O=NN(c1ccccc1)c1ccccc1	-3.753	1
O=NN1CCCC1	0.999	1
O=NN1CCCCC1	-0.174	1
O=NN1CCCCCC1	-1.001	1
O=NN1CCOCC1	0.935	1
O=Nc1c(O)ccc2ccccc12	-2.238	1
O=Nc1ccc2ccccc2c1O	-2.54	1
O=P(OC(CCl)CCl)(OC(CCl)CCl)OC(CCl)CCl	-4.789	1
O=P(Oc1ccccc1)(Oc1ccccc1)Oc1ccccc1	-5.235	1
O=P1(N(CCCl)CCCl)NCCCO1	-0.815	1
O=S(=O)(O)CS(=O)(=O)O	0.754	1
O=S(=O)(O)OCCOc1ccc(Cl)cc1Cl	-0.06	1
O=S1(=O)OC(c2ccc(O)cc2)(c2ccc(O)cc2)c2ccccc21	-2.663	1
O=S1OCC2C(CO1)C1(Cl)C(Cl)=C(Cl)C2(Cl)C1(Cl)Cl	-5.902	1
O=[N+]([O-])C(Br)(CO)CO	0.097	1
O=[N+]([O-])C(CO)(CO)CO	0.821	1
O=[N+]([O-])C(Cl)(Cl)Cl	-2.006	1
O=[N+]([O-])CCO	1.041	1
O=[N+]([O-])N1CN([N+](=O)[O-])CN([N+](=O)[O-])C1	-3.571	1
O=[N+]([O-])OC1COC2C(O[N+](=O)[O-])COC12	-2.633	1
O=[N+]([O-])OCC(CO[N+](=O)[O-])O[N+](=O)[O-]	-2.216	1
O=[N+]([O-])OCCO[N+](=O)[O-]	-1.35	1
O=[N+]([O-])c1c(Cl)c(Cl)c(Cl)c(Cl)c1Cl	-5.817	1
O=[N+]([O-])c1c(Cl)c(Cl)cc(Cl)c1Cl	-5.096	1
O=[N+]([O-])c1c(Cl)cc(Cl)cc1Cl	-4.559	1
O=[N+]([O-])c1c(O)ccc2ccccc12	-2.976	1
O=[N+]([O-])c1c(O)cccc1O	-2.073	1
O=[N+]([O-])c1c2ccccc2cc2ccccc12	-6.292	1
O=[N+]([O-])c1cc(-c2ccccc2)ccc1O	-4.41	1
O=[N+]([O-])c1cc(C(F)(F)F)ccc1O	-2.503	1
O=[N+]([O-])c1cc(C2CCCCC2)c(O)c([N+](=O)[O-])c1	-4.249	1
O=[N+]([O-])c1cc(Cl)c(Cl)c(Cl)c1Cl	-4.553	1
O=[N+]([O-])c1cc(Cl)c(Cl)cc1Cl	-3.887	1
O=[N+]([O-])c1cc(Cl)ccc1Cl	-4.137	1
O=[N+]([O-])c1cc(O)cc([N+](=O)[O-])c1	-1.663	1
O=[N+]([O-])c1cc(S(=O)(=O)Nc2ccccc2)ccc1Nc1ccccc1	-6.269	1
O=[N+]([O-])c1cc([N+](=O)[O-])c(Cl)c([N+](=O)[O-])c1	-2.669	1
O=[N+]([O-])c1cc([N+](=O)[O-])c(O)c([N+](=O)[O-])c1	-1.256	1
O=[N+]([O-])c1cc([N+](=O)[O-])c(O)c([N+](=O)[O-])c1O	-1.662	1
O=[N+]([O-])c1cc([N+](=O)[O-])cc([N+](=O)[O-])c1	-2.885	1
O=[N+]([O-])c1ccc(Cl)c(Cl)c1	-3.201	1
O=[N+]([O-])c1ccc(Cl)c(Cl)c1Cl	-3.94	1
O=[N+]([O-])c1ccc(Cl)cc1	-2.845	1
O=[N+]([O-])c1ccc(F)cc1O	-2.05	1
O=[N+]([O-])c1ccc(Nc2ccccc2)c([N+](=O)[O-])c1	-3.834	1
O=[N+]([O-])c1ccc(O)c([N+](=O)[O-])c1	-1.819	1
O=[N+]([O-])c1ccc(O)cc1	-1.079	1
O=[N+]([O-])c1ccc(Oc2c(Cl)cc(Cl)cc2Cl)cc1	-5.62	1
O=[N+]([O-])c1ccc(Oc2ccc(C(F)(F)F)cc2[N+](=O)[O-])cc1	-5.215	1
O=[N+]([O-])c1ccc(Oc2ccc(Cl)cc2Cl)cc1	-5.453	1
O=[N+]([O-])c1ccc([N+](=O)[O-])c(O)c1	-2.68	1
O=[N+]([O-])c1ccc([N+](=O)[O-])cc1	-3.387	1
O=[N+]([O-])c1ccc2c(c1)Cc1ccccc1-2	-5.99	1
O=[N+]([O-])c1ccc2ccccc2c1	-4.273	1
O=[N+]([O-])c1cccc(Cl)c1	-2.761	1
O=[N+]([O-])c1cccc(O)c1	-1.013	1
O=[N+]([O-])c1cccc([N+](=O)[O-])c1	-2.499	1
O=[N+]([O-])c1cccc([N+](=O)[O-])c1O	-1.55	1
O=[N+]([O-])c1cccc2ccccc12	-4.276	1
O=[N+]([O-])c1ccccc1	-1.77	1
O=[N+]([O-])c1ccccc1Cl	-2.896	1
O=[N+]([O-])c1ccccc1O	-1.745	1
O=[N+]([O-])c1ccccc1[N+](=O)[O-]	-3.102	1
O=c1[nH]cc(F)c(=O)[nH]1	-1.069	1
O=c1[nH]cnc2nc[nH]c12	-2.289	1
O=c1c(O)c(-c2ccc(O)cc2O)oc2cc(O)cc(O)c12	-3.082	1
O=c1cc(O)cc[nH]1	-1.25	1
O=c1cc[nH]c(=O)[nH]1	-1.493	1
O=c1cc[nH]c2ccccc12	-1.481	1
O=c1ccc(=O)[nH][nH]1	-1.271	1
O=c1ccc2ccccc2[nH]1	-2.139	1
O=c1ccc2ccccc2o1	-1.886	1
O=c1oc2ccccc2c(O)c1C1CCCc2ccccc21	-4.864	1
OC(CCl)CCl	-0.115	1
OC(Cn1cncn1)(c1ccc(F)cc1)c1ccccc1F	-3.365	1
OC(c1ccc(Cl)cc1)(c1ccc(Cl)cc1)C(Cl)(Cl)Cl	-5.448	1
OC(c1ccc(Cl)cc1)(c1cncnc1)c1ccccc1Cl	-4.383	1
OC(c1ccc(F)cc1)(c1cncnc1)c1ccccc1Cl	-4.083	1
OC(c1ccccc1)c1ccccc1	-2.549	1
OC1C(O)C(O)C(O)C(O)C1O	-0.1	1
OC1CC(O)C(O)C(O)C1O	-0.174	1
OC1CCCCC1	-0.377	1
OCC(CO)(CBr)CBr	-0.838	1
OCC(CO)(CO)CO	-0.275	1
OCC(Cl)(Cl)Cl	-0.254	1
OCC(F)(F)F	1	1
OCC(O)C(O)C(O)CO	0.625	1
OCC(O)C(O)CO	0.699	1
OCC(O)C1OC2OC(C(Cl)(Cl)Cl)OC2C1O	-1.843	1
OCC(O)CO	1.036	1
OCC(O)COc1ccc(Cl)cc1	-1.307	1
OCC(S)CS	-0.155	1
OCC1CO1	1.13	1
OCC1OC(OC2(CO)OC(CO)C(O)C2O)C(O)C(O)C1O	0.788	1
OCC1OC(n2cnc3c(O)ncnc32)C(O)C1O	-1.23	1
OCCBr	0.903	1
OCCCBr	0.009	1
OCCCCl	0.422	1
OCCCc1ccccc1	-1.38	1
OCCCl	1.094	1
OCCF	1.193	1
OCCN(CCO)c1ccccc1	-0.735	1
OCCN1CCN(CCCN2c3ccccc3Sc3ccc(C(F)(F)F)cc32)CC1	-4.149	1
OCCN1CCN(CCCN2c3ccccc3Sc3ccc(Cl)cc32)CC1	-4.155	1
OCCNCCO	0.978	1
OCCO	1.207	1
OCCOc1ccccc1	-0.714	1
OCCc1ccccc1	-0.741	1
OCc1c(Cl)cccc1Cl	-2.102	1
OCc1cccc2ccccc12	-1.744	1
OCc1ccccc1	-0.432	1
OCc1ccccc1O	-0.295	1
OCc1cccnc1	0.962	1
OCc1ccco1	1.008	1
ONc1ccccc1	-0.737	1
Oc1c(Br)cc(Br)cc1Br	-3.674	1
Oc1c(Cl)c(Cl)c(Cl)c(Cl)c1Cl	-4.279	1
Oc1c(Cl)cc(Cl)c(Cl)c1Cl	-4.004	1
Oc1c(Cl)cc(Cl)cc1Cl	-2.392	1
Oc1c(Cl)ccc(Cl)c1Cl	-2.642	1
Oc1c(Cl)cccc1Cl	-1.933	1
Oc1c2ccccc2cc2ccccc12	-4.733	1
Oc1cc(Cl)c(Cl)cc1Cl	-2.216	1
Oc1cc(Cl)cc(Cl)c1	-1.559	1
Oc1cc(Cl)ccc1Cl	-1.911	1
Oc1cc(Cl)ccc1Oc1ccc(Cl)cc1Cl	-4.462	1
Oc1cc(O)c2ccccc2c1	-1.949	1
Oc1cc(O)cc(O)c1	-1.075	1
Oc1cc2ccccc2cc1O	-2.738	1
Oc1ccc(-c2ccccc2)cc1	-3.481	1
Oc1ccc(Br)cc1	-1.092	1
Oc1ccc(Br)cc1Br	-2.123	1
Oc1ccc(Cl)cc1	-0.729	1
Oc1ccc(Cl)cc1Cc1cc(Cl)ccc1O	-3.953	1
Oc1ccc(Cl)cc1Cc1ccccc1	-3.167	1
Oc1ccc(Cl)cc1Cl	-1.559	1
Oc1ccc(N=Nc2ccccc2)cc1	-3.343	1
Oc1ccc(O)cc1	-0.184	1
Oc1ccc2c(c1)CCCC2	-1.995	1
Oc1ccc2cc(O)ccc2c1	-2.205	1
Oc1ccc2ccccc2c1	-2.281	1
Oc1ccc2ncccc2c1	-2.162	1
Oc1cccc(Br)c1	-0.876	1
Oc1cccc(Cl)c1	-0.694	1
Oc1cccc(Cl)c1Cl	-1.656	1
Oc1cccc(O)c1	0.814	1
Oc1cccc(O)c1O	0.604	1
Oc1cccc2c(O)cccc12	-2.987	1
Oc1cccc2ccccc12	-2.221	1
Oc1cccc2cccnc12	-2.417	1
Oc1ccccc1	-0.056	1
Oc1ccccc1-c1ccccc1	-2.386	1
Oc1ccccc1Cl	-1.056	1
Oc1ccccc1O	0.622	1
Oc1cccnc1	-0.456	1
Oc1nc(O)c2nccnc2n1	-2.118	1
Oc1ncnc2[nH]ncc12	-2.379	1
S=C1NCCN1	-0.708	1
S=C=NCc1ccccc1	-3.136	1
S=C=Nc1cccc(Br)c1	-4.085	1
S=C=Nc1cccc2ccccc12	-4.602	1
S=C=S	-1.81	1
Sc1ccccc1	-2.12	1
Sc1nc2ccccc2s1	-3.182	1
c1cc(-c2ccncc2)ccn1	-1.538	1
c1cc2c3c(c1)ccc1cccc(c13)C2	-5.238	1
c1cc2c3c(c4ccc5ccccc5c4cc3c1)CC2	-7.861	1
c1cc2c3c(ccc4c3c1CCC4)CCC2	-5.959	1
c1cc2c3c(cccc3c1)CC2	-4.597	1
c1cc2ccc3ccc4ccc5cccc6c(c1)c2c3c4c56	-9.026	1
c1cc2ccc3cccc4ccc(c1)c2c34	-6.176	1
c1cc2cccc3c4cccc5cccc(c(c1)c23)c54	-8.8	1
c1cc[nH]c1	-0.173	1
c1ccc(-c2ccc(-c3ccccc3)cc2)cc1	-7.107	1
c1ccc(-c2cccc(-c3ccccc3)c2)cc1	-5.183	1
c1ccc(-c2ccccc2)cc1	-4.347	1
c1ccc(-c2ccccn2)nc1	-1.421	1
c1ccc(C2CO2)cc1	-1.603	1
c1ccc(CCc2ccccc2)cc1	-4.627	1
c1ccc(COCc2ccccc2)cc1	-3.695	1
c1ccc(Cc2ccccc2)cc1	-4.077	1
c1ccc(N=Nc2ccccc2)cc1	-4.454	1
c1ccc(Nc2cccc3ccccc23)cc1	-3.563	1
c1ccc(Nc2ccccc2)cc1	-3.504	1
c1ccc(OCC2CO2)cc1	-1.796	1
c1ccc(Oc2ccccc2)cc1	-3.976	1
c1ccc2[nH]ccc2c1	-1.517	1
c1ccc2[nH]ncc2c1	-2.155	1
c1ccc2[nH]nnc2c1	-0.779	1
c1ccc2c(c1)-c1cccc3c1c-2cc1ccccc13	-8.226	1
c1ccc2c(c1)-c1cccc3cccc-2c13	-5.891	1
c1ccc2c(c1)CCC2	-3.035	1
c1ccc2c(c1)CCCC2	-3.452	1
c1ccc2c(c1)Cc1c-2ccc2ccccc12	-6.678	1
c1ccc2c(c1)Cc1cc3ccccc3cc1-2	-8.034	1
c1ccc2c(c1)Cc1ccccc1-2	-4.944	1
c1ccc2c(c1)Nc1ccccc1S2	-5.098	1
c1ccc2c(c1)OCCOCCOc1ccccc1OCCOCCO2	-4.693	1
c1ccc2c(c1)Oc1ccccc1O2	-5.311	1
c1ccc2c(c1)[nH]c1ccccc12	-4.968	1
c1ccc2c(c1)c1cccc3ccc4cccc2c4c31	-7.844	1
c1ccc2c(c1)c1ccccc1c1ccccc21	-6.745	1
c1ccc2c(c1)cc1ccc3cccc4ccc2c1c34	-8.192	1
c1ccc2c(c1)ccc1c3ccccc3ccc21	-8.057	1
c1ccc2c(c1)ccc1cc3c(ccc4ccccc43)cc12	-8.048	1
c1ccc2c(c1)ccc1cc3ccc4ccccc4c3cc12	-8.432	1
c1ccc2c(c1)ccc1ccccc12	-5.19	1
c1ccc2c(c1)ccc1ncccc12	-3.357	1
c1ccc2c(c1)cnc1ccccc12	-2.776	1
c1ccc2c(c1)oc1ccccc12	-4.734	1
c1ccc2c(c1)sc1ccccc12	-5.098	1
c1ccc2c3c(ccc2c1)-c1cccc2cccc-3c12	-8.004	1
c1ccc2cc3c(cc2c1)-c1cccc2cccc-3c12	-8.499	1
c1ccc2cc3c(ccc4ccccc43)cc2c1	-7.385	1
c1ccc2cc3c4ccccc4c4ccccc4c3cc2c1	-8.24	1
c1ccc2cc3cc4ccccc4cc3cc2c1	-8.18	1
c1ccc2cc3ccccc3cc2c1	-6.614	1
c1ccc2ccccc2c1	-3.616	1
c1ccc2cnccc2c1	-1.456	1
c1ccc2cnncc2c1	-0.415	1
c1ccc2nc(-c3ccc4ccccc4n3)ccc2c1	-5.4	1
c1ccc2nc3ccccc3cc2c1	-3.669	1
c1ccc2ncccc2c1	-1.325	1
c1ccc2ocnc2c1	-1.155	1
c1ccc2sccc2c1	-3.014	1
c1ccc2scnc2c1	-1.497	1
c1ccccc1	-1.64	1
c1ccncc1	1.102	1
c1ccnnc1	1.096	1
c1ccoc1	-0.833	1
c1ccsc1	-1.446	1
c1cnc2c(c1)ccc1cccnc12	-1.826	1
c1cnc2ncncc2n1	0.034	1
c1cncc(C2CCCCN2)c1	0.79	1
c1cncnc1	1.096	1
Brc1ccc2ccccc2c1	-4.4	0.9
C#CC	-0.41	0.45
C#CC1(O)CCC2C3CCC4=CC(=O)CCC4(O)C3CCC21C	-4.57	0.45
C#CC1(O)CCC2C3CCC4=Cc5oncc5CC4(C)C3CCC21C	-5.507	0.45
C/C=C/C=O	0.32	0.45
C/C=C/CC	-2.54	0.45
C/C=C/CCCC	-3.82	0.45
C/C=C\CC	-2.54	0.45
C=C(Br)CC1(C(C)CC)C(=O)NC(=O)NC1=O	-2.647	0.45
C=C(C)C1Cc2c(ccc3c2OC2COc4cc(OC)c(OC)cc4C2C3=O)O1	-4.42	0.9
C=CC	-1.08	0.45
C=CC1(C)OC(=O)N(c2cc(Cl)cc(Cl)c2)C1=O	-4.925	0.45
C=CCC1(C(C)CC)C(=O)NC(=O)NC1=O	-2.016	0.45
C=CCC1(C(C)CCC)C(=O)NC(=O)NC1=O	-2.356	0.45
C=CCC1(C)C(=O)NC(=O)NC1=O	-1.16	0.45
C=CCC1(CC)C(=O)NC(=O)NC1=O	-1.614	0.45
C=CCCCCCCCC	-5.51	0.45
C=CCS[S+]([O-])CC=C	-0.83	0.9
CC(=O)C1(C)CCC2C3C=C(C)C4=CC(=O)CCC4(C)C3CCC21C	-5.27	0.9
CC(=O)CC(c1ccc(Cl)cc1)c1c(O)c2ccccc2oc1=O	-5.839	0.45
CC(=O)CCC1C(=O)N(c2ccccc2)N(c2ccccc2)C1=O	-3.27	0.9
CC(=O)N(c1onc(C)c1C)[S+]([O-])c1ccc(N)cc1	-3.59	0.45
CC(=O)Nc1ccc(Br)cc1	-3.0815	0.9
CC(=O)Nc1ccc(Cl)cc1	-2.8415	0.9
CC(=O)Nc1ccc(F)cc1	-1.78	0.9
CC(=O)Nc1ccc([N+](=O)[O-])cc1	-2.691	0.9
CC(=O)OC1(C)CCC2C3CCC4=CC(=O)CCC4(C)C3CCC21C	-5.284	0.45
CC(=O)OC1CCC2C3CCC4=CC(=O)CCC4(C)C3CCC12C	-5.184	0.45
CC(=O)OCN1C(=O)NC(c2ccccc2)(c2ccccc2)C1=O	-4.47	0.45
CC(C)(C)Cc1ccccc1	-4.15	0.45
CC(C)=CC1C(C(=O)OCc2cccc(Oc3ccccc3)c2)C1(C)C	-5.24	0.9
CC(C)=CCC/C(C)=C\CO	-2.46	0.45
CC(C)=CCC1(C(C)C)C(=O)NC(=O)NC1=O	-2.593	0.45
CC(C)C(C)(C)C	-4.36	0.45
CC(C)C1(C(C)C)C(=O)NC(=O)NC1=O	-2.766	0.45
CC(C)CCCCCOC(=O)c1ccccc1C(=O)OCCCCCC(C)C	-6.637	0.45
CC(C)CCl	-2	0.9
CC(C)CNC(=O)N1CCNC1=O	-2.15	0.9
CC(C)Cc1ccccc1	-4.12	0.9
[truncated: 1,949 more rows]

## Sheet: Solubility Challenge-2
Table S2. Prdiction vs Experimental Solubilities on SC-2 dataset
Compound Name	smiles	SD	n	logS (experiment)	logS (prediction)	Error
Cefprozil	C/C=C/C1=C(C(=O)O)N2C(=O)[C@@H](NC(=O)[C@H](N)c3ccc(O)cc3)[C@H]2SC1	0.2	4	-1.68	-2.02568	0.345679			n = number of literature references on measured solubility
Ibrutinib	C=CC(=O)N1CCC[C@@H](n2nc(-c3ccc(Oc4ccccc4)cc3)c3c(N)ncnc32)C1	0.19	7	-4.85	-5.35149	0.501486			SD = standard deviation
Alclofenac	C=CCOc1ccc(CC(=O)O)cc1Cl	0.16	4	-4.4	-2.94038	1.45962			logS = interlab. Mean equilibrium solubility (molarity units)
Warfarin	CC(=O)CC(c1ccccc1)c1c(O)oc2ccccc2c1=O	0.2	11	-4.78	-4.05182	0.728178
Ketoconazole	CC(=O)N1CCN(c2ccc(OC[C@H]3CO[C@](Cn4ccnc4)(c4ccc(Cl)cc4Cl)O3)cc2)CC1	0.14	11	-5.47	-5.07731	0.392692
Thiacetazone	CC(=O)Nc1ccc(/C=N/NC(N)=S)cc1	0.16	10	-3.5	-2.48832	1.01168
Acetazolamide	CC(=O)Nc1nnc(S(N)(=O)=O)s1	0.18	11	-2.38	-2.08309	0.296912
Cortisone_Acetate	CC(=O)OCC(=O)[C@@]1(O)CC[C@H]2[C@@H]3CCC4=CC(=O)CC[C@]4(C)[C@H]3C(=O)C[C@@]21C	0.13	4	-4.22	-3.87972	0.340285
Diflorasone_Diacetate	CC(=O)OCC(=O)[C@@]1(OC(C)=O)[C@@H](C)C[C@H]2[C@@H]3C[C@H](F)C4=CC(=O)C=C[C@]4(C)[C@@]3(F)[C@@H](O)C[C@@]21C	0.16	3	-4.82	-4.80336	0.0166436
Acetylsalicylic_Acid	CC(=O)Oc1ccccc1C(=O)O	0.15	16	-1.67	-1.9548	0.284797
Spironolactone	CC(=O)S[C@@H]1CC2=CC(=O)CC[C@]2(C)[C@H]2CC[C@@]3(C)[C@@H](CC[C@@]34CCC(=O)O4)[C@H]12	0.16	6	-4.21	-4.88318	0.673183
Flurbiprofen	CC(C(=O)O)c1ccc(-c2ccccc2)c(F)c1	0.2	23	-4.34	-3.99177	0.34823
Indoprofen	CC(C(=O)O)c1ccc(N2Cc3ccccc3C2=O)cc1	0.21	5	-4.65	-3.6929	0.9571
Indinavir	CC(C)(C)NC(=O)[C@@H]1CN(Cc2cccnc2)CCN1C[C@@H](O)C[C@@H](Cc1ccccc1)C(=O)N[C@H]1c2ccccc2C[C@H]1O	0.16	5	-4.53	-4.70188	0.171882
Pindolol	CC(C)NCC(O)COc1cccc2[nH]ccc12	0.15	9	-3.75	-2.19372	1.55628
Ritonavir	CC(C)c1nc(CN(C)C(=O)N[C@H](C(=O)N[C@@H](Cc2ccccc2)C[C@H](O)[C@H](Cc2ccccc2)NC(=O)OCc2cncs2)C(C)C)cs1	0.16	5	-5.17	-6.77804	1.60804
Promethazine	CC(CN1c2ccccc2Sc2ccccc21)N(C)C	0.19	11	-4.38	-3.58767	0.792328
Eucalyptol	CC12CCC(CC1)C(C)(C)O2	0.21	3	-1.66	-2.90776	1.24776
Cephradine	CC1=C(C(=O)O)N2C(=O)[C@@H](NC(=O)[C@H](N)C3=CCC=CC3)[C@H]2SC1	0.13	8	-1.18	-1.60502	0.425022
Sulindac	CC1=C(CC(=O)O)c2cc(F)ccc2/C1=C\c1ccc(S(C)=O)cc1	0.21	7	-4.96	-5.01671	0.0567061
Diazoxide	CC1=NS(=O)(=O)c2cc(Cl)ccc2N1	0.22	4	-3.43	-3.06735	0.362646
Prednisolone,Methyl-	CC1CC2C(C(O)CC3(C)C2CCC3(O)C(=O)CO)C2(C)C=CC(=O)C=C12	0.18	5	-3.33	-3.1276	0.202405
Flumequine	CC1CCc2cc(F)cc3c(=O)c(C(=O)O)cn1c23	0.19	3	-3.9	-3.29111	0.608891
Ofloxacin	CC1COc2c(N3CCN(C)CC3)c(F)cc3c(=O)c(C(=O)O)cn1c23	0.13	14	-2.03	-2.77011	0.740113
Cyclosporine_A	CC=CCC(C)C(O)C1C(=O)NC(CC)C(=O)N(C)CC(=O)N(C)C(CC(C)C)C(=O)NC(C(C)C)C(=O)N(C)C(CC(C)C)C(=O)NC(C)C(=O)NC(C)C(=O)N(C)C(CC(C)C)C(=O)N(C)C(CC(C)C)C(=O)N(C)C(C(C)C)C(=O)N1C	0.16	6	-5.03	-4.81584	0.214162
Pravastatin	CCC(C)C(=O)OC1CC(O)C=C2C=CC(C)C(CCC(O)CC(O)CC(=O)O)C21	0.15	10	-4.86	-3.0574	1.8026
Barbital,Buta-	CCC(C)C1(CC)C(=O)NC(=O)NC1=O	0.16	10	-2.22	-2.13631	0.0836922
Primidone	CCC1(c2ccccc2)C(=O)NCNC1=O	0.14	4	-2.53	-2.22371	0.30629
Oxyphenbutazone	CCCCC1C(=O)N(c2ccccc2)N(c2ccc(O)cc2)C1=O	0.19	3	-3.94	-3.64332	0.296678
Tetracaine	CCCCNc1ccc(C(=O)OCCN(C)C)cc1	0.11	3	-3.11	-3.21456	0.104565
Probenecid	CCCN(CCC)S(=O)(=O)c1ccc(C(=O)O)cc1	0.2	4	-4.83	-3.02797	1.80203
Chlorpropamide	CCCNC(=O)NS(=O)(=O)c1ccc(Cl)cc1	0.14	7	-3.17	-3.06874	0.101255
Atrazine	CCNc1nc(Cl)nc(NC(C)C)n1	0.15	6	-3.69	-3.38595	0.304049
Enalapril	CCOC(=O)[C@H](CCc1ccccc1)N[C@@H](C)C(=O)N1CCC[C@H]1C(=O)O	0.21	3	-1.36	-1.95946	0.599459
Repaglinide	CCOc1cc(CC(=O)N[C@@H](CC(C)C)c2ccccc2N2CCCCC2)ccc1C(=O)O	0.17	4	-4.77	-5.79704	1.02704
Phenacetin	CCOc1ccc(NC(C)=O)cc1	0.14	10	-2.3	-1.94561	0.354393
Ethoxzolamide	CCOc1ccc2nc(S(N)(=O)=O)sc2c1	0.17	3	-3.76	-2.91252	0.847476
Candesartan_cilexetil	CCOc1nc2cccc(C(=O)OC(C)OC(=O)OC3CCCCC3)c2n1Cc1ccc(-c2ccccc2-c2nn[nH]n2)cc1	0.15	6	-6.79	-7.57855	0.788554
Norfloxacin	CCn1cc(C(=O)O)c(=O)c2cc(F)c(N3CCNCC3)cc21	0.16	19	-2.88	-2.7513	0.128697
Promazine	CN(C)CCCN1c2ccccc2Sc2ccccc21	0.13	4	-4.45	-4.57082	0.120821
Tetracycline	CN(C)[C@@H]1C(=O)/C(=C(\N)O)C(=O)[C@@]2(O)C(=O)C3=C(O)c4c(O)cccc4[C@@](C)(O)[C@H]3C[C@@H]12	0.15	8	-3.22	-2.23209	0.987913
Difloxacin	CN1CCN(c2cc3c(cc2F)c(=O)c(C(=O)O)cn3-c2ccc(F)cc2)CC1	0.21	3	-3.83	-3.60005	0.229945
Cimetidine	CN=C(NC#N)NCCSCc1nc[nH]c1C	0.22	8	-1.52	-1.74305	0.223047
Nortriptyline	CNCCC=C1c2ccccc2CCc2ccccc21	0.16	5	-3.93	-4.42078	0.490775
Maprotiline	CNCCCC12CCC(c3ccccc31)c1ccccc12	0.22	5	-4.62	-5.10608	0.486079
Desipramine	CNCCCN1c2ccccc2CCc2ccccc21	0.18	3	-3.83	-4.04319	0.213188
Cefmenoxime	CO/N=C(\C(=O)N[C@@H]1C(=O)N2C(C(=O)O)=C(CSc3nnnn3C)CS[C@H]12)c1csc(N)n1	0.14	7	-3.27	-2.73309	0.536906
Nifedipine	COC(=O)C1=C(C)NC(C)=C(C(=O)OC)C1c1ccccc1[N+](=O)[O-]	0.15	11	-4.71	-3.59175	1.11825
Carbendazim	COC(=O)Nc1nc2ccccc2[nH]1	0.19	4	-4.56	-3.07583	1.48417
Griseofulvin	COC1=CC(=O)C[C@@H](C)[C@]12Oc1c(Cl)c(OC)cc(OC)c1C2=O	0.19	15	-4.52	-4.32232	0.197684
Cisapride	COc1cc(N)c(Cl)cc1C(=O)NC1CCN(CCCOc2ccc(F)cc2)CC1OC	0.17	6	-6.78	-5.16617	1.61383
Etoposide	COc1cc([C@@H]2c3cc4c(cc3[C@@H](O[C@@H]3O[C@@H]5CO[C@@H](C)O[C@H]5[C@H](O)[C@H]3O)C3COC(=O)[C@@H]32)OCO4)cc(OC)c1O	0.2	4	-3.6	-2.15348	1.44652
Papaverine	COc1ccc(Cc2nccc3cc(OC)c(OC)cc23)cc1OC	0.19	12	-4.33	-4.87337	0.543366
Diltiazem	COc1ccc([C@@H]2Sc3ccccc3N(CCN(C)C)C(=O)[C@@H]2OC(C)=O)cc1	0.13	3	-3.02	-3.85268	0.832681
Indomethacin	COc1ccc2c(c1)c(CC(=O)O)c(C)n2C(=O)c1ccc(Cl)cc1	0.22	21	-5.48	-4.67714	0.802858
Noscapine	COc1ccc2c(c1OC)C(=O)O[C@@H]2[C@H]1c2c(cc3c(c2OC)OCO3)CCN1C	0.14	3	-4.48	-3.4452	1.0348
Naproxen	COc1ccc2cc(C(C)C(=O)O)ccc2c1	0.16	17	-4.23	-3.48443	0.745569
Nabumetone	COc1ccc2cc(CCC(C)=O)ccc2c1	0.21	3	-4.4	-4.27736	0.122636
Nimesulide	CS(=O)(=O)Nc1ccc([N+](=O)[O-])cc1Oc1ccccc1	0.14	5	-4.74	-3.86456	0.875444
Rofecoxib	CS(=O)(=O)c1ccc(C2=C(c3ccccc3)C(=O)OC2)cc1	0.16	5	-4.61	-4.03627	0.573725
Dexamethasone	C[C@@H]1C[C@H]2[C@@H]3CCC4=CC(=O)C=C[C@]4(C)[C@@]3(F)[C@@H](O)C[C@]2(C)[C@@]1(O)C(=O)CO	0.18	16	-3.56	-3.22255	0.337446
Cholic_Acid,Deoxy-	C[C@H](CCC(=O)O)[C@H]1CC[C@H]2[C@@H]3CC[C@@H]4C[C@H](O)CC[C@]4(C)[C@H]3C[C@H](O)[C@]12C	0.15	7	-4.62	-4.66829	0.0482906
Triamcinolone	C[C@]12C=CC(=O)C=C1CC[C@H]1[C@@H]3C[C@@H](O)[C@](O)(C(=O)CO)[C@@]3(C)C[C@H](O)[C@@]12F	0.21	5	-3.52	-2.70887	0.811126
Estrone	C[C@]12CC[C@@H]3c4ccc(O)cc4CC[C@H]3[C@@H]1CCC2=O	0.19	8	-5.38	-4.50465	0.875353
Estradiol,17Î±-	C[C@]12CC[C@@H]3c4ccc(O)cc4CC[C@H]3[C@@H]1CC[C@H]2O	0.18	5	-5	-4.07671	0.923292
Corticosterone	C[C@]12C[C@H](O)[C@H]3[C@@H](CCC4=CC(=O)CC[C@@]43C)[C@@H]1CC[C@@H]2C(=O)CO	0.17	7	-3.29	-3.51634	0.226344
Nelfinavir	Cc1c(O)cccc1C(=O)N[C@@H](CSc1ccccc1)[C@H](O)CN1C[C@H]2CCCC[C@H]2C[C@H]1C(=O)NC(C)(C)C	0.2	3	-6.21	-6.43788	0.227876
Sulfisomidine	Cc1cc(NS(=O)(=O)c2ccc(N)cc2)nc(C)n1	0.14	3	-2.16	-2.96971	0.809712
Celecoxib	Cc1ccc(-c2cc(C(F)(F)F)nn2-c2ccc(S(N)(=O)=O)cc2)cc1	0.18	6	-5.89	-4.91036	0.979645
Metolazone	Cc1ccccc1N1C(=O)c2cc(S(N)(=O)=O)c(Cl)cc2NC1C	0.21	8	-3.88	-4.07195	0.191947
Nevirapine	Cc1ccnc2c1NC(=O)c1cccnc1N2C1CC1	0.14	6	-3.41	-3.5802	0.170203
Glipizide	Cc1cnc(C(=O)NCCc2ccc(S(=O)(=O)NC(=O)NC3CCCCC3)cc2)cn1	0.21	9	-5.61	-4.00063	1.60937
Sulfisoxazole	Cc1noc(NS(=O)(=O)c2ccc(N)cc2)c1C	0.14	3	-3.13	-2.74495	0.385053
Carbamazepine	NC(=O)N1c2ccccc2C=Cc2ccccc21	0.16	15	-3.22	-3.36113	0.141132
Baclofen	NCC(CC(=O)O)c1ccc(Cl)cc1	0.15	4	-1.78	-2.33602	0.556015
Benzthiazide	NS(=O)(=O)c1cc2c(cc1Cl)NC(CSCc1ccccc1)=NS2(=O)=O	0.22	6	-4.84	-4.30392	0.536076
DOPA,L-	N[C@@H](Cc1ccc(O)c(O)c1)C(=O)O	0.17	6	-1.76	-1.42239	0.337609
Ambroxol	Nc1c(Br)cc(Br)cc1CN[C@H]1CC[C@H](O)CC1	0.17	3	-3.87	-3.66535	0.20465
Phenazopyridine	Nc1ccc(N=Nc2ccccc2)c(N)n1	0.16	7	-4.02	-3.18487	0.835135
Sulfathiazole	Nc1ccc(S(=O)(=O)Nc2nccs2)cc1	0.22	9	-2.62	-2.47341	0.146587
Folic_Acid	Nc1nc(=O)c2nc(CNc3ccc(C(=O)N[C@@H](CCC(=O)O)C(=O)O)cc3)cnc2[nH]1	0.16	6	-5.96	-3.73609	2.22391
Ganciclovir	Nc1nc(=O)c2ncn(COC(CO)CO)c2[nH]1	0.13	3	-1.78	-1.80753	0.027535
Triamterene	Nc1nc(N)c2nc(-c3ccccc3)c(N)nc2n1	0.14	9	-4.11	-3.07653	1.03347
Haloperidol	O=C(CCCN1CCC(O)(c2ccc(Cl)cc2)CC1)c1ccc(F)cc1	0.17	10	-5.71	-5.59664	0.11336
Sulfasalazine	O=C(O)C1=C/C(=N\Nc2ccc(S(=O)(=O)Nc3ccccn3)cc2)C=CC1=O	0.14	9	-6.41	-3.23354	3.17646
Fenbufen	O=C(O)CCC(=O)c1ccc(-c2ccccc2)cc1	0.21	10	-5.18	-3.83375	1.34625
Diclofenac	O=C(O)Cc1ccccc1Nc1c(Cl)cccc1Cl	0.18	33	-5.34	-4.81063	0.529375
Ciprofloxacin	O=C(O)c1cn(C2CC2)c2cc(N3CCNCC3)c(F)cc2c1=O	0.18	20	-3.57	-2.57846	0.991539
Atovaquone	O=C1C(O)=C(C2CCC(c3ccc(Cl)cc3)CC2)C(=O)c2ccccc21	0.18	3	-6.07	-6.63065	0.560654
Cilostazol	O=C1CCc2cc(OCCCCc3nnnn3C3CCCCC3)ccc2N1	0.13	3	-4.93	-4.53938	0.390619
Aripiprazole	O=C1CCc2ccc(OCCCCN3CCN(c4cccc(Cl)c4Cl)CC3)cc2N1	0.21	3	-6.64	-5.41291	1.22709
Bromazepam	O=C1CN=C(c2ccccn2)c2cc(Br)ccc2N1	0.13	3	-3.39	-4.13138	0.741375
Strychnine	O=C1C[C@@H]2OCC=C3CN4CC[C@]56c7ccccc7N1[C@H]5[C@H]2[C@H]3C[C@H]46	0.19	6	-3.38	-3.05635	0.323651
Oxazepam	O=C1Nc2ccc(Cl)cc2C(c2ccccc2)=NC1O	0.17	5	-4.03	-3.29849	0.731511
Xanthine	O=c1[nH]c(=O)c2[nH]cnc2[nH]1	0.21	3	-3.6	-2.13928	1.46072
Daidzein	O=c1c(-c2ccc(O)cc2)coc2cc(O)ccc12	0.13	5	-5.23	-4.14435	1.08565
Perphenazine	OCCN1CCN(CCCN2c3ccccc3Sc3ccc(Cl)cc32)CC1	0.17	6	-4.48	-4.42554	0.0544609
Resveratrol,trans-	Oc1ccc(/C=C/c2cc(O)cc(O)c2)cc1	0.18	7	-3.75	-3.26559	0.484406
Diphenylamine	c1ccc(Nc2ccccc2)cc1	0.14	3	-3.53	-3.26488	0.265124
Carbazole	c1ccc2c(c1)[nH]c1ccccc12	0.19	3	-5.19	-3.81135	1.37865
